## Research Article

# Molecular phylogenetics and character evolution of morphologically diverse groups, *Dendrobium* section *Dendrobium* and allies

Tomoko Takamiya<sup>1</sup>, Pheravut Wongsawad<sup>2</sup>, Apirada Sathapattayanon<sup>3</sup>, Natsuko Tajima<sup>2</sup>, Shunichiro Suzuki<sup>1</sup>, Saki Kitamura<sup>1</sup>, Nao Shioda<sup>1</sup>, Takashi Handa<sup>4</sup>, Susumu Kitanaka<sup>1</sup>, Hiroshi Iijima<sup>1</sup> and Tomohisa Yukawa<sup>5\*</sup>

<sup>1</sup> School of Pharmacy, Nihon University, Funabashi, Chiba 274-8555, Japan

<sup>2</sup> Institute of Agriculture and Forestry, University of Tsukuba, Tsukuba, Ibaraki 305-8572, Japan

<sup>3</sup> Faculty of Science, Srinakharinwirot University, Bangkok 10110, Thailand

<sup>4</sup> School of Agriculture, Meiji University, Kawasaki, Kanagawa 214-8571, Japan

<sup>5</sup> Tsukuba Botanical Garden, National Museum of Nature and Science, Tsukuba, Ibaraki 305-0005, Japan

**Received:** 14 April 2014; **Accepted:** 15 July 2014; **Published:** 7 August 2014

**Associate Editor:** Chelsea D. Specht

**Citation:** Takamiya T, Wongsawad P, Sathapattayanon A, Tajima N, Suzuki S, Kitamura S, Shioda N, Handa T, Kitanaka S, Iijima H, Yukawa T. 2014. Molecular phylogenetics and character evolution of morphologically diverse groups, *Dendrobium* section *Dendrobium* and allies. *AoB PLANTS* 6: plu045; doi:10.1093/aobpla/plu045

**Abstract.** It is always difficult to construct coherent classification systems for plant lineages having diverse morphological characters. The genus *Dendrobium*, one of the largest genera in the Orchidaceae, includes ~1100 species, and enormous morphological diversification has hindered the establishment of consistent classification systems covering all major groups of this genus. Given the particular importance of species in *Dendrobium* section *Dendrobium* and allied groups as floriculture and crude drug genetic resources, there is an urgent need to establish a stable classification system. To clarify phylogenetic relationships in *Dendrobium* section *Dendrobium* and allied groups, we analysed the macromolecular characters of the group. Phylogenetic analyses of 210 taxa of *Dendrobium* were conducted on DNA sequences of internal transcribed spacer (ITS) regions of 18S–26S nuclear ribosomal DNA and the maturase-coding gene (*matK*) located in an intron of the plastid gene *trnK* using maximum parsimony and Bayesian methods. The parsimony and Bayesian analyses revealed 13 distinct clades in the group comprising section *Dendrobium* and its allied groups. Results also showed paraphyly or polyphyly of sections *Amblyanthus*, *Aporum*, *Breviflores*, *Calcarifera*, *Crumenata*, *Dendrobium*, *Densiflora*, *Distichophyllae*, *Dolichocentrum*, *Holochrysa*, *Oxyglossum* and *Pedilonum*. On the other hand, the monophyly of section *Stachyobium* was well supported. It was found that many of the morphological characters that have been believed to reflect phylogenetic relationships are, in fact, the result of convergence. As such, many of the sections that have been recognized up to this point were found to not be monophyletic, so recircumscription of sections is required.

**Keywords:** *Dendrobium*; evolution; ITS; *matK*; Orchidaceae; phylogeny; systematics; taxonomy.

\* Corresponding author's e-mail address: yukawa@kahaku.go.jp

Published by Oxford University Press on behalf of the Annals of Botany Company.

This is an Open Access article distributed under the terms of the Creative Commons Attribution License (<http://creativecommons.org/licenses/by/4.0/>), which permits unrestricted reuse, distribution, and reproduction in any medium, provided the original work is properly cited.

## Introduction

It is always difficult to construct coherent classification systems for plant lineages having diverse morphological characters. *Dendrobium* Sw. (Orchidaceae) represents such difficult groups and so far has been established in many alternative systems (e.g. Lindley 1830; Bentham and Hooker 1883; Kränzlin 1910; Schlechter 1912; Brieger 1981; Clements 2003; Wood 2006; Schuiteman 2011). This genus is one of the largest orchid genera, with around 1100 species (Wood 2006). The distribution range extends from Sri Lanka and India throughout tropical Asia and Oceania, north to Japan, east to Tahiti and south to New Zealand. Enormous diversification of the vegetative organs in accordance with habitat shifts and lack of accessory structures of the pollinarium, a cardinal character in orchid classification, has hindered establishment of consistent classification systems covering all major groups of this genus. Previous studies of systematics based on the morphological characteristics of the group were reviewed by Wood (2006). Given the limits to what can be understood of affinities using morphological characters, Yukawa et al. (1993) analysed the molecular phylogenetics of the subtribe Dendrobiinae (Lindley 1830), which includes the genus *Dendrobium* and putatively related genera *Cadetia*, *Diplocaulobium*, *Flickingeria*, *Epigeneium* and *Pseuderia* based on chloroplast DNA restriction site variation. This analysis resulted in presentation of the first probable phylogenetic relationship between members of this genus. Yukawa et al. (1993) demonstrated that *Dendrobium* is not monophyletic and comprises two major clades (Asian and Australasian clades: sensu Clements 2003). The Asian clade is predominantly diversified west of Weber's line, and the Australasian clade, containing genera *Cadetia*, *Diplocaulobium* and *Flickingeria*, is distributed mostly in Australasia and the Pacific Islands. Subsequent studies on representative members of subtribe Dendrobiinae (e.g. Yukawa et al. 1996, 1999, 2000; Yukawa 2001; Clements 2003, 2006; Schuiteman 2011) incorporated additional macromolecular markers and taxa in their analyses. In addition to providing further support for the above-mentioned phylogeny, these studies identified other infrageneric monophyletic groups.

*Dendrobium* section *Dendrobium* is one of the largest sections in the genus *Dendrobium*, comprising ~60 species (Wood 2006) distributed across almost the entire geographical range of the genus, with the exception of Micronesia and Melanesia. A number of species are considered important as crude drug sources and are highly sought-after genetic resources with potential value in medicine (Takamiya et al. 2011, 2013). Yukawa et al. (1993) demonstrated that section *Dendrobium* is nested

within the Asian clade. Wongsawad et al. (2001, 2005) analysed sequences for the maturase-coding gene (*matK*) located in the plastid genome and the internal transcribed spacer regions (ITS) of the nuclear ribosomal DNA of 78 Asian clade species including 35 of section *Dendrobium* (Wongsawad et al. 2001) and 93 Asian clade species including 42 members of section *Dendrobium* (Wongsawad et al. 2005). Based on these analyses, Wongsawad et al. demonstrated that section *Dendrobium* is not monophyletic; that its core clade includes species of sections *Breviflores*, *Densiflora*, *Holochrysa* and *Stuposa*; and that sections *Amblyanthus*, *Breviflores*, *Densiflora*, *Formosae*, *Holochrysa*, *Oxyglossum* and *Pedilonum* are not monophyletic. These relationships were confirmed by Xiang et al. (2013). However, given that these studies did not include several species of section *Dendrobium* and only included a small number of species in sections *Aporum*, *Calcarifera*, *Calyptrochilus*, *Crumenata*, *Distichophyllae*, *Oxyglossum*, *Pedilonum*, *Platycaulon*, *Stachyobium* and *Stuposa*, which are likely to be closely related to section *Dendrobium*, our understanding of the relationships between section *Dendrobium* and other groups within the Asian clade remains incomplete. In this study, we conducted comprehensive phylogenetic analyses of representative species in the Asian clade using the ITS and *matK* regions to clarify the relationships and the taxonomic position of section *Dendrobium*.

## Methods

### Plant materials

The samples for analysis consisted of 210 Asian clade species (214 samples), including 56 species belonging to section *Dendrobium*. As an outgroup, we chose 10 species of the Australasian clade, based on the results of Yukawa (2001). Plant materials were collected from the living collection of Tsukuba Botanical Garden, National Museum of Nature and Science. All voucher specimens were deposited at the Herbarium, National Museum of Nature and Science (TNS). Voucher information and GenBank accession numbers for all ITS and *matK* sequences used in this study are listed in Appendix 1. We adopted an infrageneric classification based on that proposed by Schlechter (1912) and modified by Wood (2006).

### DNA extraction and sequencing

Genomic DNA was isolated from fresh leaves or flowers by a DNeasy Plant Mini Kit (Qiagen, Hamburg, Germany) following the manufacturer's instructions, and was used as a template for PCR amplification. ITS1-5.8S-ITS2 regions were amplified and sequenced as described by Sun

*et al.* (1994) and Hidayat *et al.* (2005). The amplification reactions included GC buffer I or II and LA Taq DNA polymerase (Takara Bio, Shiga, Japan). The PCR profile consisted of an initial 2-min premelt at 94 °C and 30 cycles of 50 s at 94 °C (denaturation), 1 min at 60 °C (annealing) and 30 s at 72 °C (extension), followed by a final 7-min extension at 72 °C. *matK* regions were amplified and sequenced as described by Hidayat *et al.* (2005). The amplification reactions included Ex Taq buffer and Ex Taq DNA polymerase (Takara Bio). The PCR profile consisted of an initial 5-min premelt at 94 °C and 30 cycles of 30 s at 94 °C (denaturation), 30 s at 53 °C (annealing) and 3 min at 72 °C (extension), followed by a final 7-min extension at 72 °C.

The PCR products were cleaned using a Montage PCR centrifugal filter device (Millipore, Billerica, MA, USA) and then sequenced in both forward and reverse directions using primers described by Hidayat *et al.* (2005). Sequences were obtained with an ABI PRISM 377 sequencer (Applied Biosystems, Foster City, CA, USA) following the manufacturer's instructions for auto-cycle sequencing reactions.

### Molecular phylogenetic analysis

Except for ITS and *matK* sequences of *Dendrobium ovatum* obtained from GenBank (accession ID for ITS: HM054721; *matK*: HM055325), all sequence data were obtained by our own analyses. Two hundred and twenty-four DNA sequences were aligned with ClustalW software. A phylogenetic analysis based on the maximum parsimony (MP) was performed using PAUP\* version 4.0b10 (Swofford 2002) for three data sets: ITS, *matK* and a combination of the two. Gaps were treated as missing data. All characters were equally weighted and unordered (Fitch 1971). Each data set was analysed by a heuristic search method with tree bisection–reconnection branch swapping and the MULTREES option on 100 replications of random addition sequence with the stepwise addition option, and each replicate after  $1 \times 10^6$  rearrangements was assessed. Bootstrap support values were obtained from 1000 replicates using 'fast' stepwise addition. Although the fast stepwise addition analyses are expected to provide a lower support value than obtained when comprehensive branch-swapping is performed (DeBry and Olmstead 2000; Mort *et al.* 2000; Barkman *et al.* 2004), we used this option because bootstrap analyses with a full heuristic search method were not computationally feasible with a large data set. Bootstrap percentages (BPs) of 50–74 were defined as weak, 75–84 as moderate and 85–100 as strong, as in Chase *et al.* (2000) and Kim *et al.* (2010). The number of steps, consistency index (CI) and retention index (RI) were calculated with one of the most parsimonious trees in each analysis using the TREE SCORES

command in PAUP\*. To test congruence among data partitions, the incongruence length difference test (Farris *et al.* 1994, 1995), also designated the partition homogeneity test in PAUP\*, was employed to measure character conflicts under a parsimony framework among data sets using 100 heuristic search replications.

The same data sets were analysed by Bayesian analysis using MrModeltest ver. 2.3 (Nylander 2004) to determine the sequence evolution model that best described the data. The GTR + I + G model was chosen for ITS, *matK* and the combined data by hierarchical likelihood ratio tests. The chosen model was used to perform a Bayesian analysis using the program MrBayes ver. 3.1.2 (Huelsenbeck and Ronquist 2001; Ronquist and Huelsenbeck 2003). For analysis, two simultaneous runs of four chains each were carried out with the Markov chain Monte Carlo algorithm for 8 000 000 generations, sampling every 100 generations. Data from the first 20 000 generations were discarded as the 'burn-in' period. The 50 % majority rule consensus phylogeny and posterior probability (PP) of nodes were calculated from the remaining samples. Clades with PP  $\geq$  95 were regarded as strongly supported (Martínez-Azorín *et al.* 2011).

### Ancestral state reconstruction of morphological characters

Among various morphological characters, stem shape and leaf number were examined with ancestral state reconstruction analysis due to their complex pattern of character states even among closely related taxa. Character states for each taxon were obtained from the literature (Seidenfaden 1985; Wood 2006) and observation by the authors. A parsimony reconstruction was performed with the 'Unordered' model in Mesquite 2.75 (Maddison and Maddison 2011). The Bayesian tree based on the combined sequence data (ITS and *matK*) was used as the standard tree topology (see Fig. 1).

## Results

### Parsimony analyses of ITS, *matK* and combined sequences of the two

Table 1 shows statistics from ITS, *matK* and combined sequences. We compared topologies between strict consensus trees of ITS and *matK* data sets [see **Supporting Information**]. Visual inspection of the topologies between the two regions did not show significant incongruence, although an incongruence length difference test did not support congruence ( $P$  value = 0.01). Inconsistent topologies where bootstrap support is weak can be ignored as a soft incongruence (Johnson and Soltis 1998). Moreover, strongly supported clades by *matK* were generally strongly supported by ITS except for six inconsistent

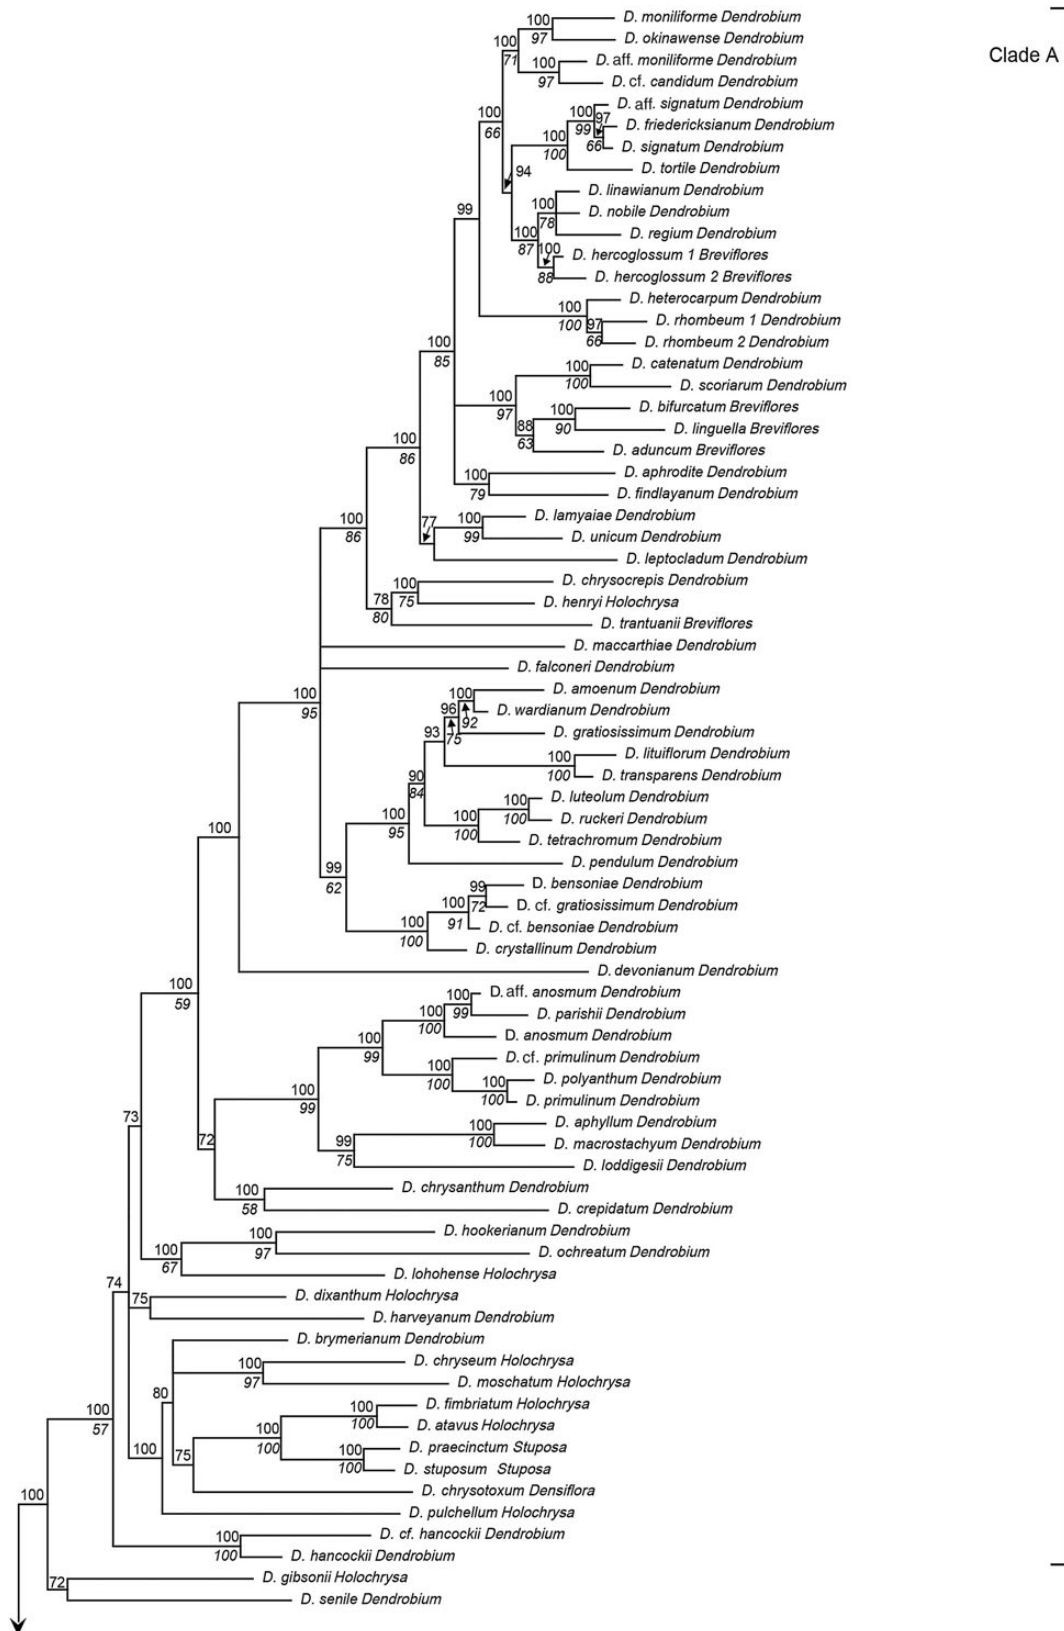

**Figure 1.** Consensus phylogram of 210 taxa of *Dendrobium* section *Dendrobium* and allied groups obtained from 96 596 Bayesian trees from the combined ITS and *matK* sequence data set. Values below and above branches indicate percentage bootstrap values from maximum parsimony analysis and Bayesian posterior probabilities, respectively.

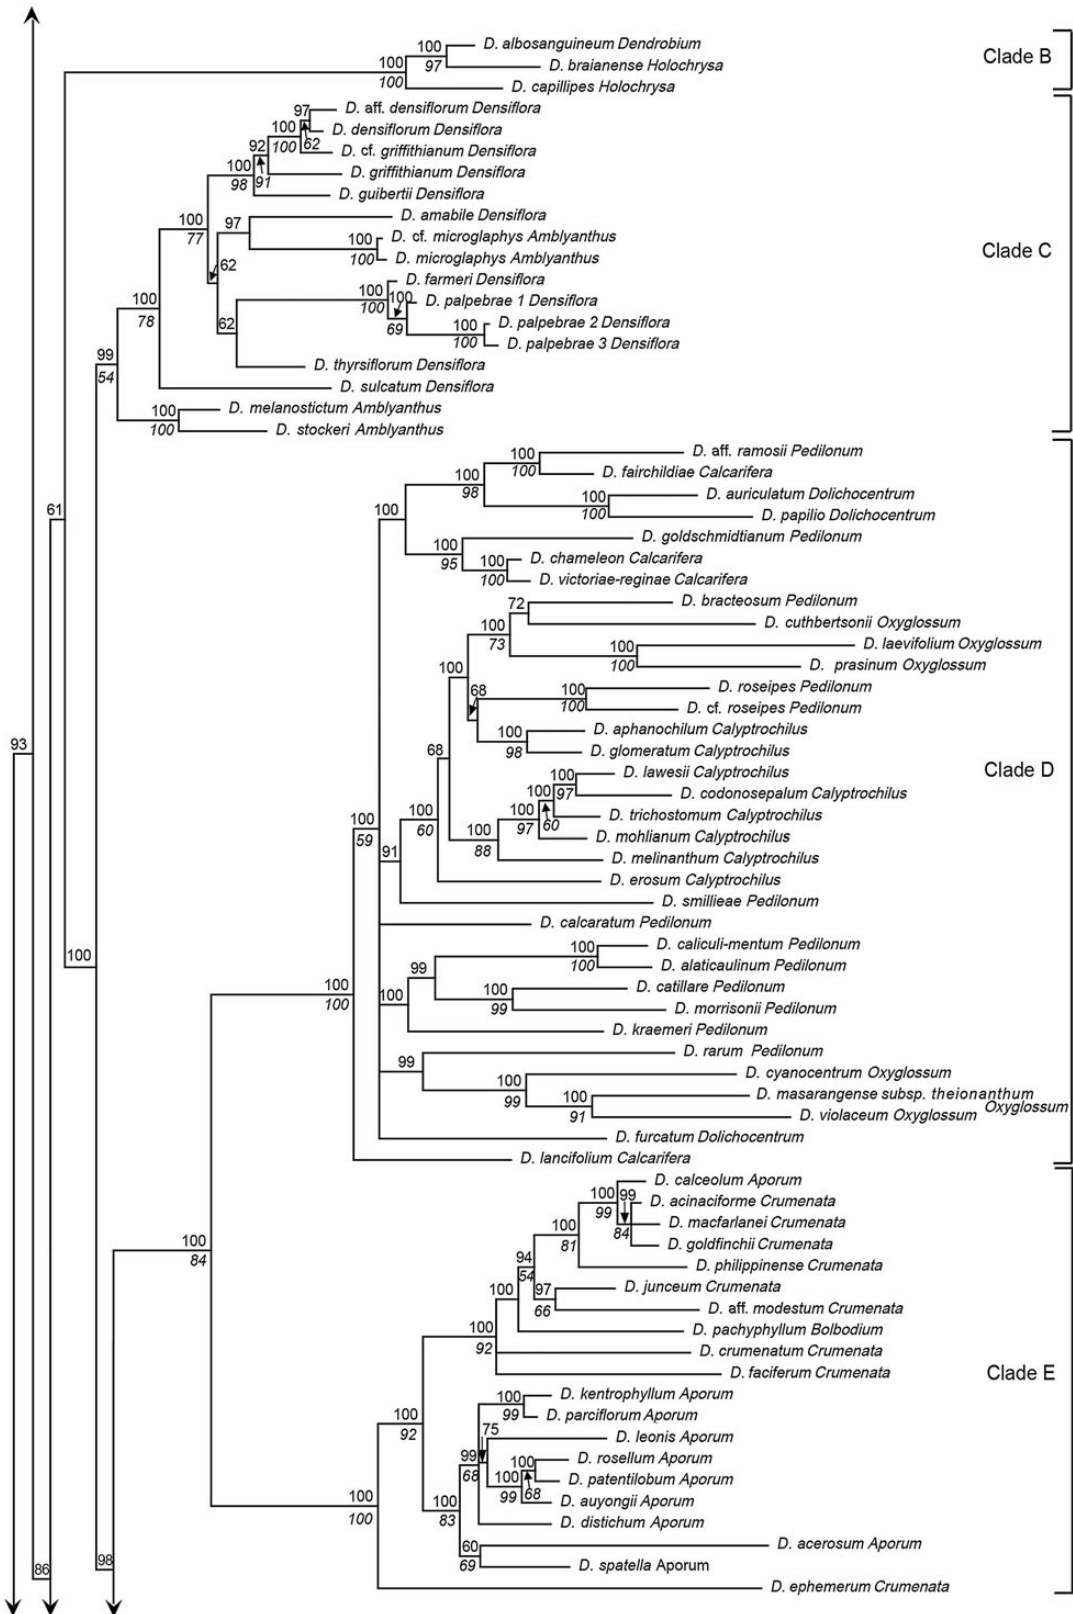

Figure 1. Continued.

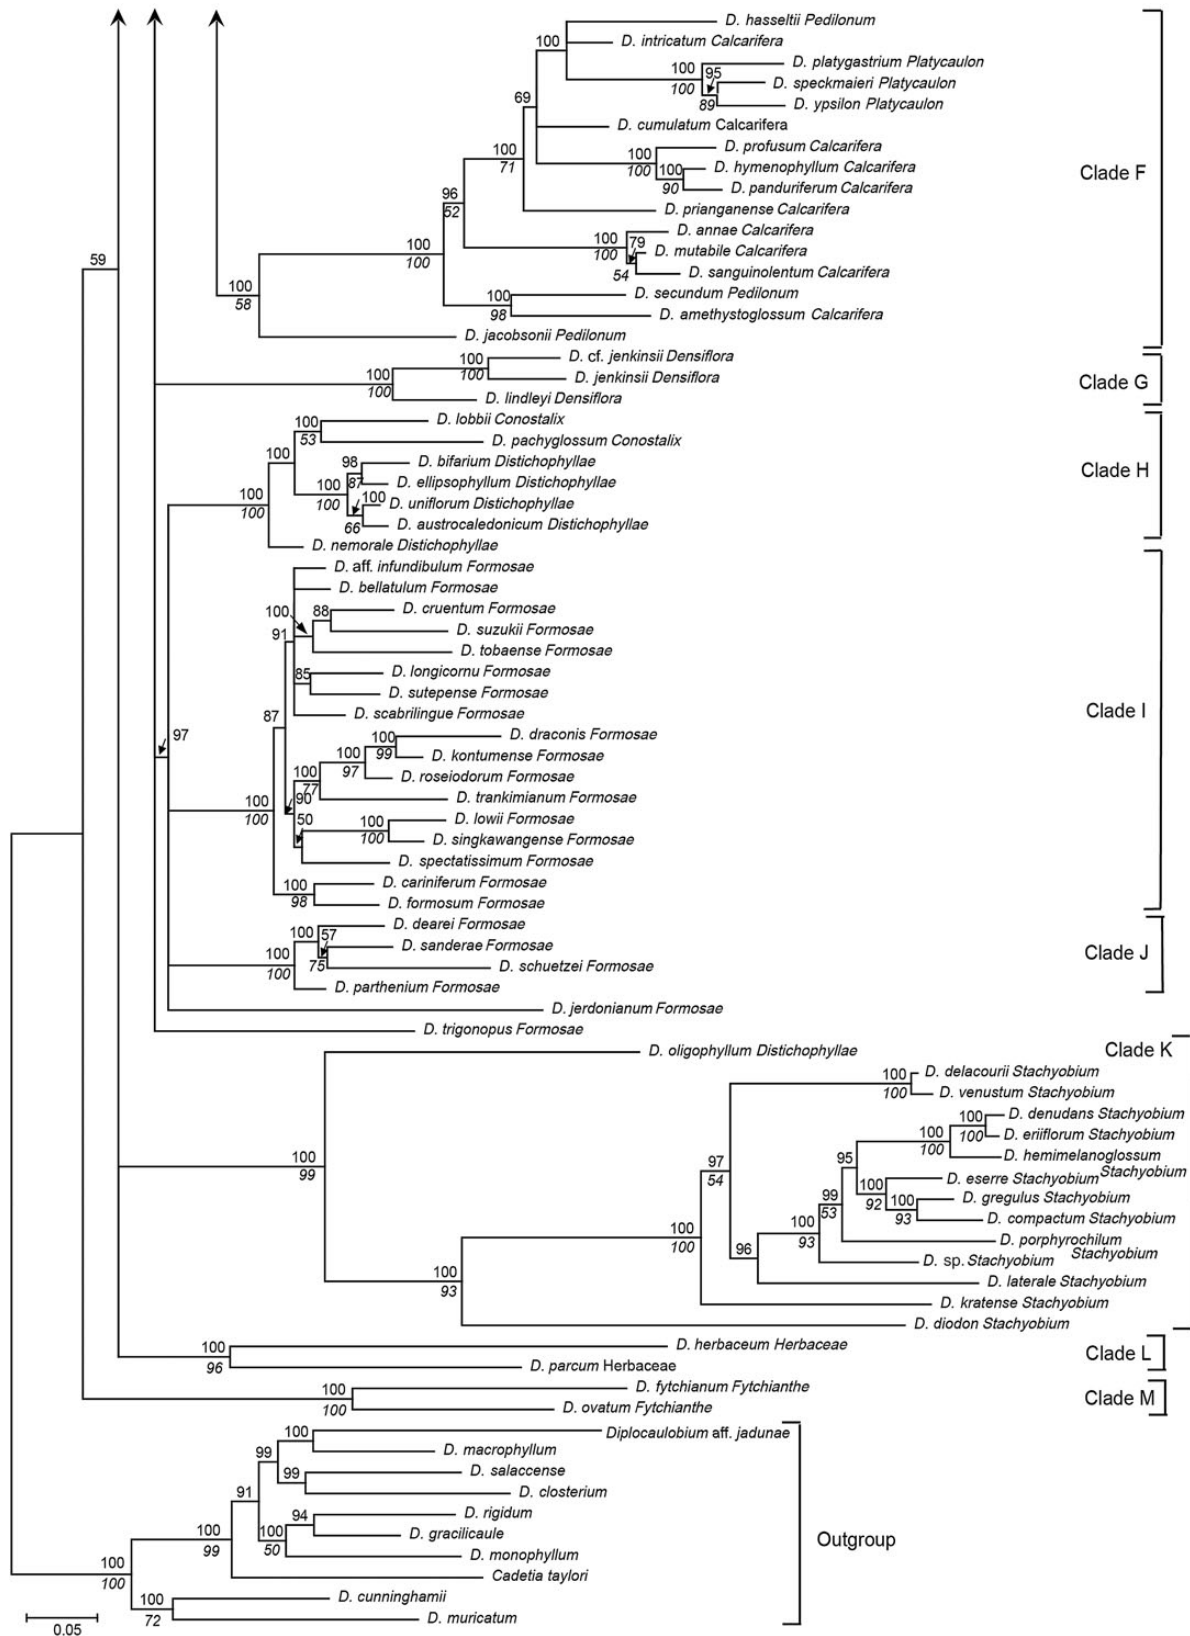

Figure 1. Continued.

**Table 1.** Characteristics of DNA datasets used in this study.

| Characteristics                              | ITS         | matK        | Combined data |
|----------------------------------------------|-------------|-------------|---------------|
| Number of taxa                               | 224         | 224         | 224           |
| Total number of characters                   | 906         | 1630        | 2536          |
| Number of constant characters                | 303         | 1092        | 1395          |
| Number of parsimony uninformative characters | 102         | 279         | 381           |
| Number of parsimony informative characters   | 501         | 259         | 760           |
| Tree length                                  | 5522        | 1092        | 6692          |
| Consistency index (CI)                       | 0.226       | 0.6016      | 0.2847        |
| Retention index (RI)                         | 0.715       | 0.7915      | 0.7198        |
| Number of trees                              | 140         | 4638        | 103           |
| Bayesian model of evolution                  | GTR + I + G | GTR + I + G | GTR + I + G   |

regions [see Supporting Information]. Since analyses of combined data sets provide more resolution and internal support for relationships than individual data sets (Soltis et al. 1998), we combined ITS and *matK* data for further analysis.

In the majority of cases, BPs for trees based on the combined data set were higher than those obtained from analysis based on ITS or *matK* alone. For example, six clades supported by BP at <85 % in both genetic regions when based on either individual data set had BP >85 % in the combined case.

### Bayesian analyses of ITS, *matK* and combined sequences of the two

Comparing the Bayesian trees and strict consensus tree of the most parsimonious trees constructed from ITS and *matK* sequences, we found that in terms of the differences in results based on the sequence used, the clades of strict consensus trees that were strongly supported by bootstrap value in both ITS and *matK* trees were also strongly supported by the PP value [see Supporting Information]. However, when we compared the strict consensus tree of the most parsimonious trees and the Bayesian trees with the ITS sequence, we found phylogenetic relationships in four parts where they were not strongly supported by PP value, even if they were by BP value. Specifically, these were the clade comprising *Dendrobium amoenum*, *D. gratiosissimum*, *D. wardianum*, *D. lituiflorum*, *D. transparens*, *D. luteolum*, *D. ruckeri* and *D. tetrachromum* (BP86, PP90); the clade comprising *D. aff. densiflorum*, *D. densiflorum*, *D. cf. griffithianum* and *D. griffithianum* (BP87, PP84); the clade comprising *D. farmeri* and *D. palpebrae* (BP87, PP75); and the clade comprising *D. speckmaieri* and *D. ypsilon* (BP89, PP92).

That said, the PP values for these regions were still fairly high. Furthermore, as in the case for MP analysis, Bayesian analysis revealed that there are no inconsistencies between ITS and *matK* data sets, so the two regions were combined for subsequent analysis.

The combined tree obtained from a majority-rule consensus of 96 596 trees produced by two runs of the Markov chain Monte Carlo algorithm is presented in Fig. 1. With the exception of one clade consisting of *D. aff. densiflorum*, *D. densiflorum*, *D. cf. griffithianum* and *D. griffithianum* (BP91, PP92), all of the clades that were strongly supported in bootstrap tests based on MP analysis were also strongly supported by PP values in Bayesian analysis. In this study, major clades whose BP values from MP analysis were >50 % and those whose PP values from Bayesian analysis were >95 %—i.e. clades at least weakly supported by bootstrap values and strongly supported by PP values—were assigned letters A through M. Clade A comprises the majority of sections *Dendrobium* and *Holochrysa*, as well as sections *Breviflores* and *Stuposa*, and *Dendrobium chrysotoxum* in section *Densiflora*. Clade B comprises *Dendrobium albosanguineum* in section *Dendrobium* and *Dendrobium braianense* and *D. capillipes* in section *Holochrysa*. Clade C comprises the majority of section *Densiflora* and section *Amblyanthus*. Clade D consists of some members of sections *Pedilonum* and *Calcarifera* along with sections *Dolichocentrum*, *Oxyglossum* and *Calyptrochilus*. Clade E comprises sections *Aporum*, *Crumenata* and *Bolbodium*. Clade F comprises section *Platycaulon* and some members of sections *Pedilonum* and *Calcarifera*. Clade G comprises *D. cf. jenkinsii*, *D. jenkinsii* and *D. lindleyi* in section *Densiflora*. Clade H comprises section *Conostalix* and the majority of section *Distichophyllae*. Clade I comprises the

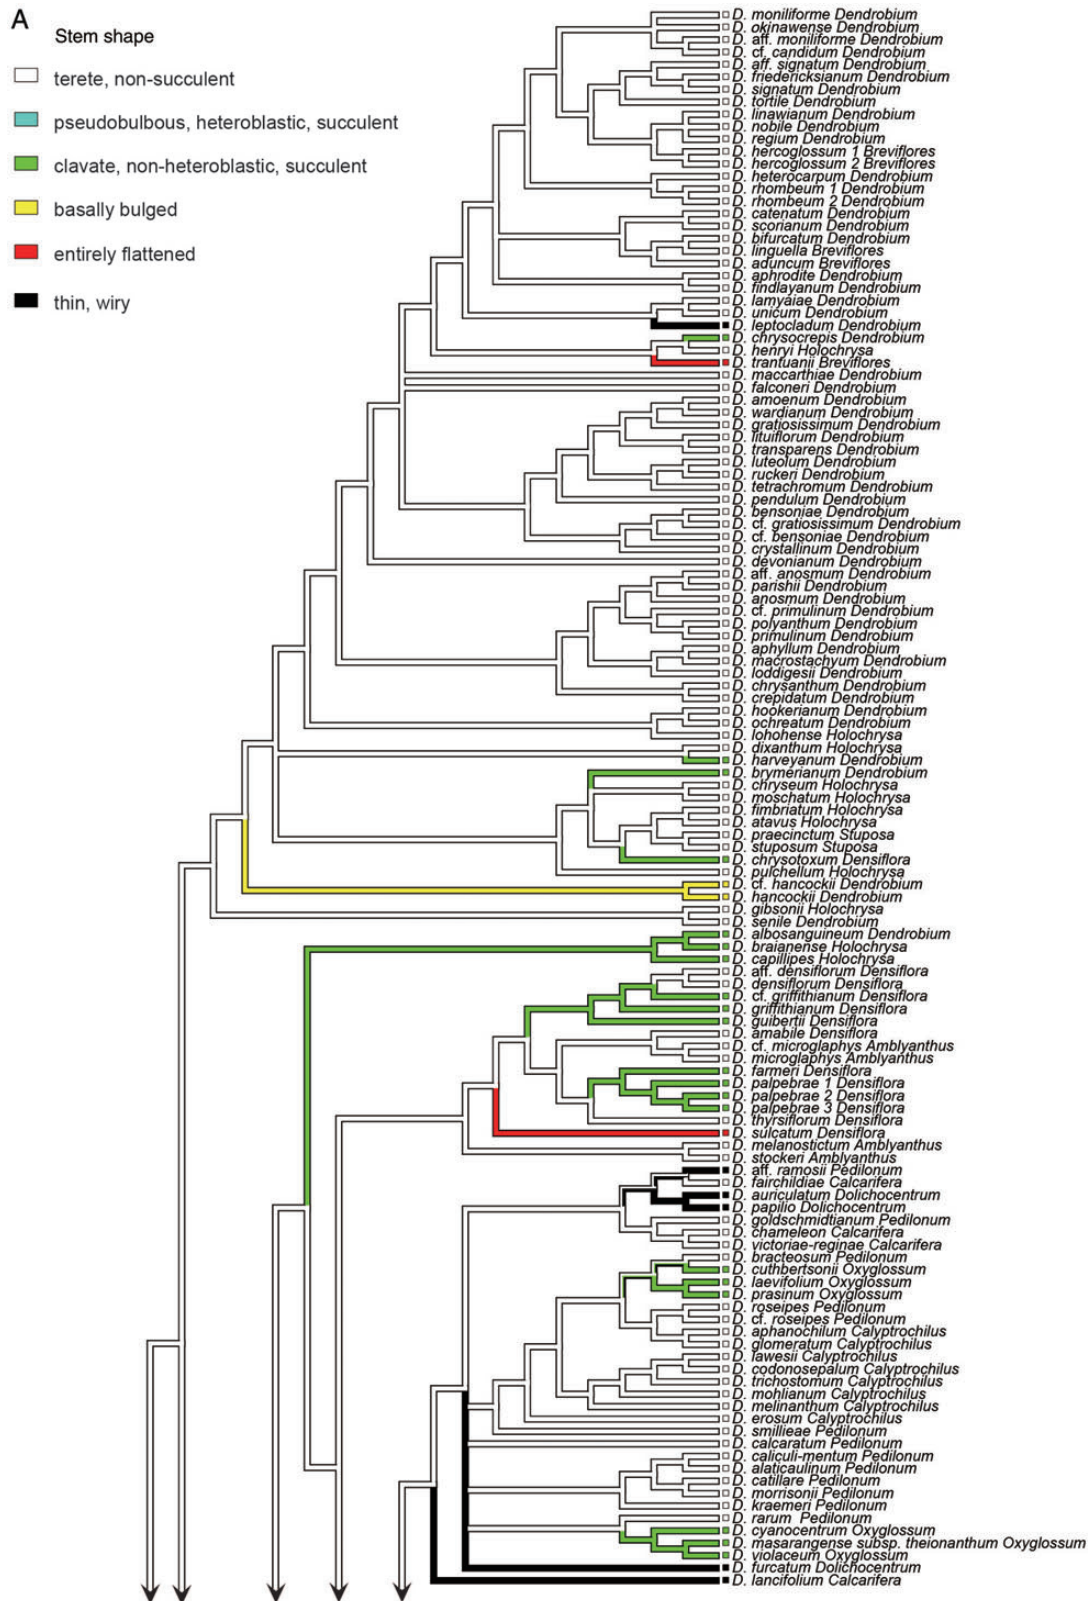

**Figure 2.** Ancestral state reconstruction of morphological characters ((A) stem shape; (B) leaf number) of 210 taxa of *Dendrobium* section *Dendrobium* and allied groups. All analyses were based on the parsimony reconstruction.



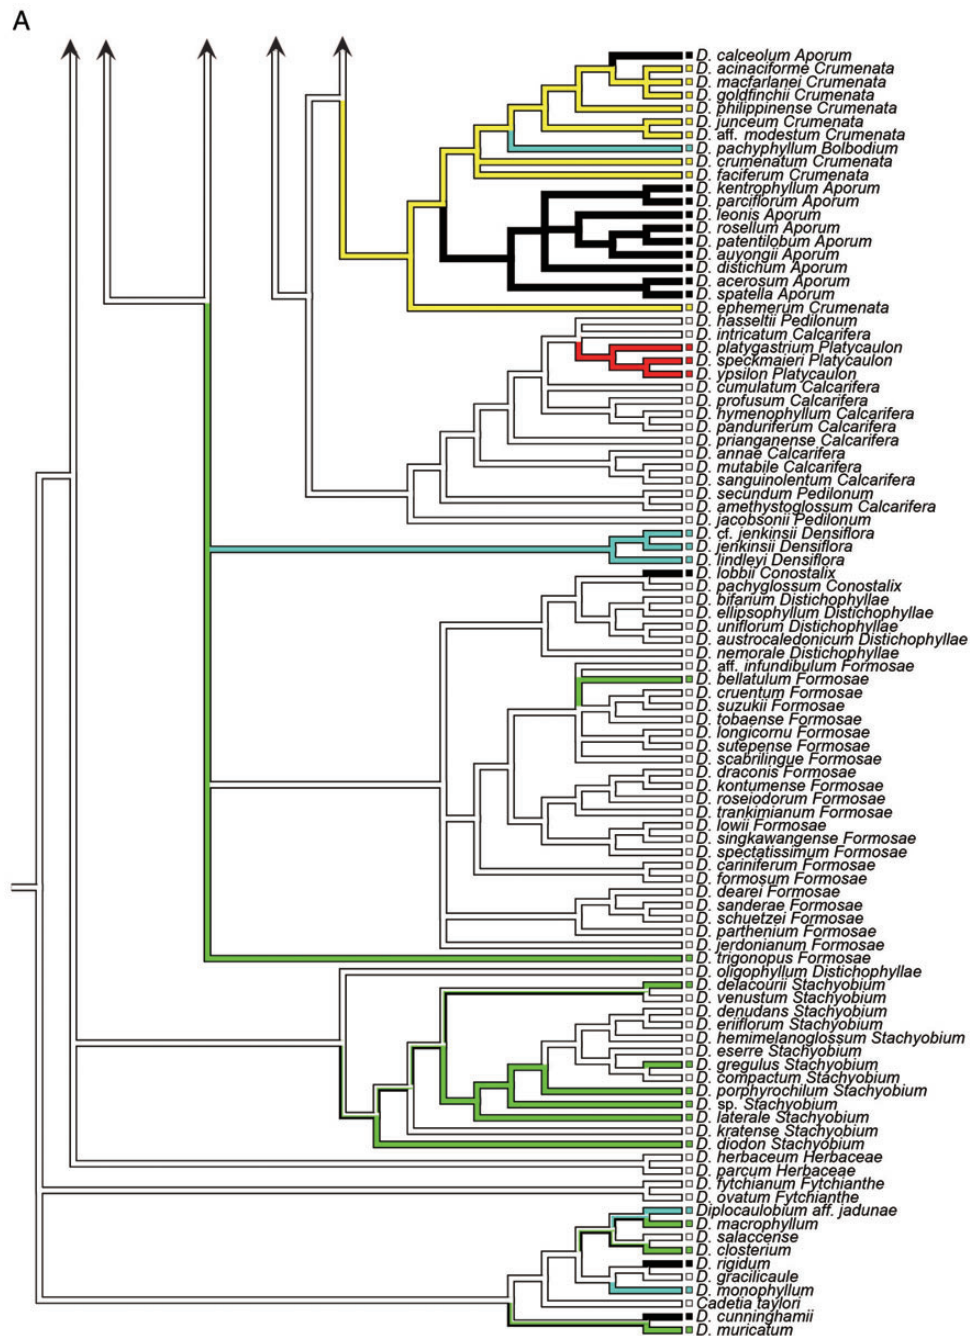

Figure 2. Continued.

majority of section *Formosae*. Clade J comprises *D. dearei*, *D. parthenium*, *D. sanderae* and *D. schuetzei* in section *Formosae*. Clade K comprises section *Stachyobium* and *Dendrobium oligophyllum* in section *Distichophyllae*. Clade L comprises section *Herbaceae*. Clade M comprises section *Fytchianthe*. No clear relationship to other clades was indicated for *Dendrobium gibsonii* in section *Holochrysa*, *D. senile* in section *Dendrobium*, or *D. jerdonianum* and *D. trigonopus* in section *Formosae*.

### Ancestral state reconstruction of morphological characters

In the analysis of stem shape morphology, the terete, non-succulent stem was supported as the plesiomorphic state in the Asian clade (Fig. 2A). The other stem character states, namely, pseudobulbous, heteroblastic, succulent stem; clavate, non-heteroblastic, succulent stem; basally bulged stem; entirely flattened stem; and thin, wiry stem, were inferred to evolve twice, more than

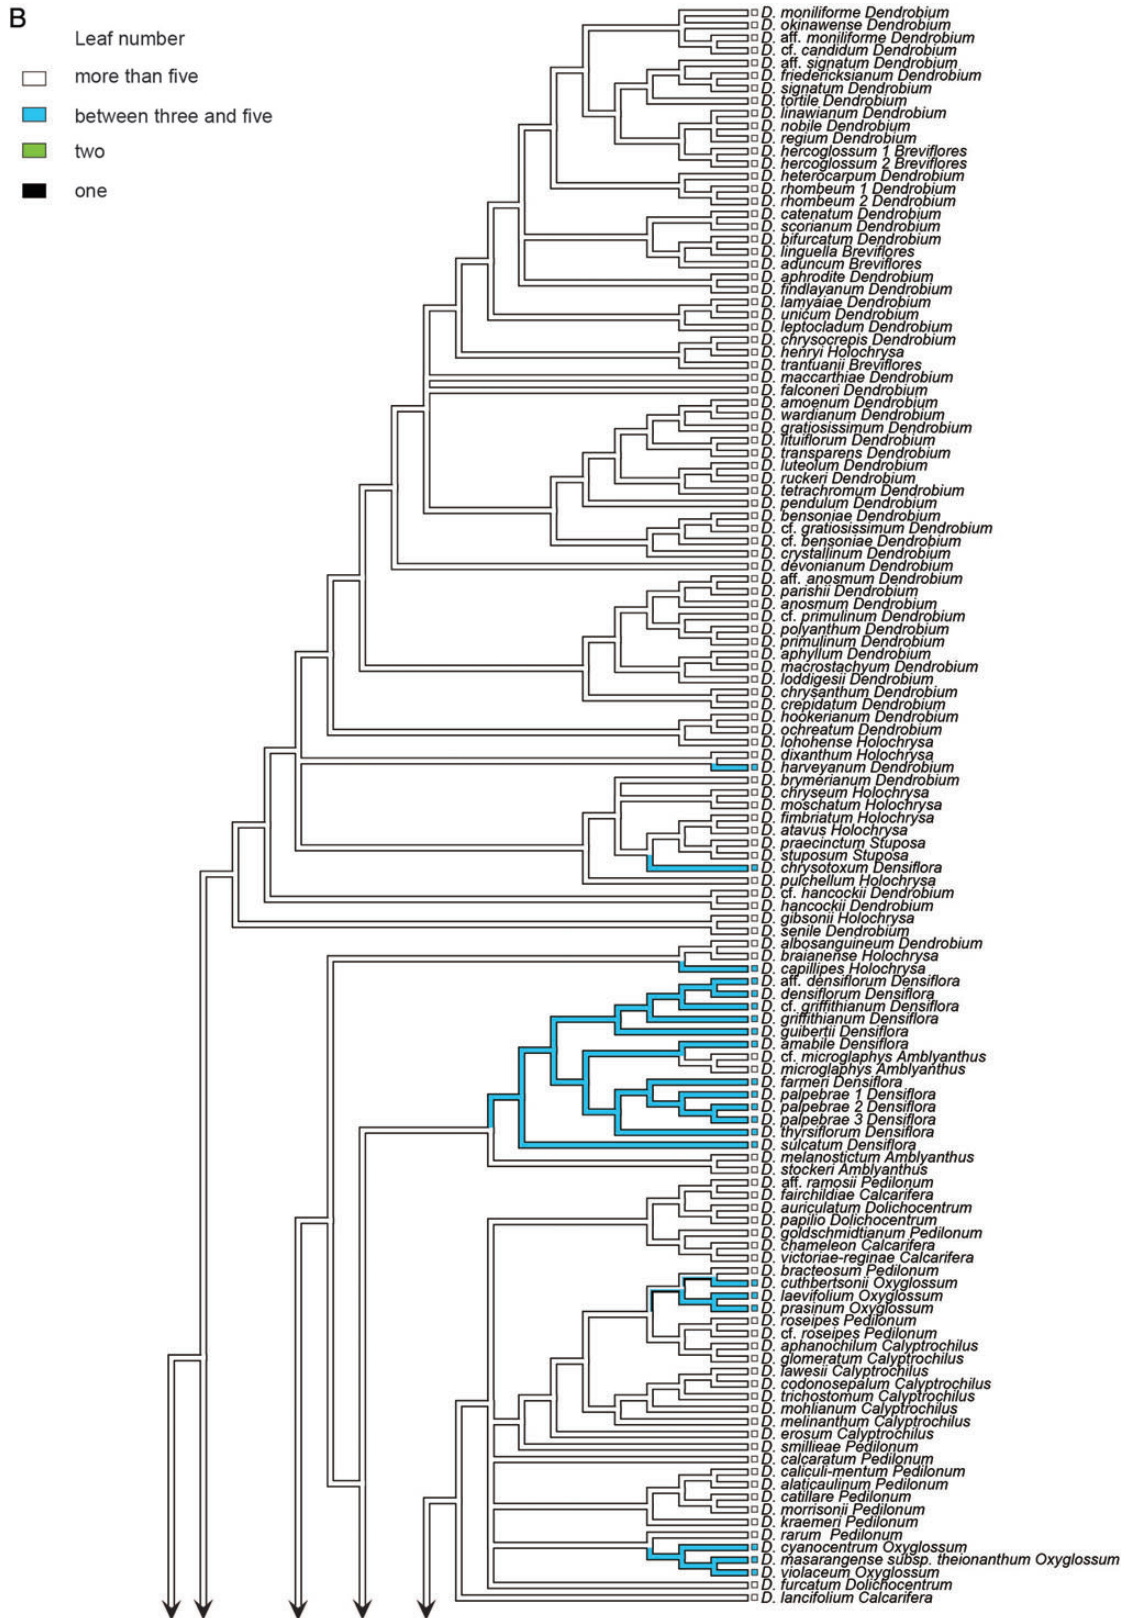

Figure 2. Continued.

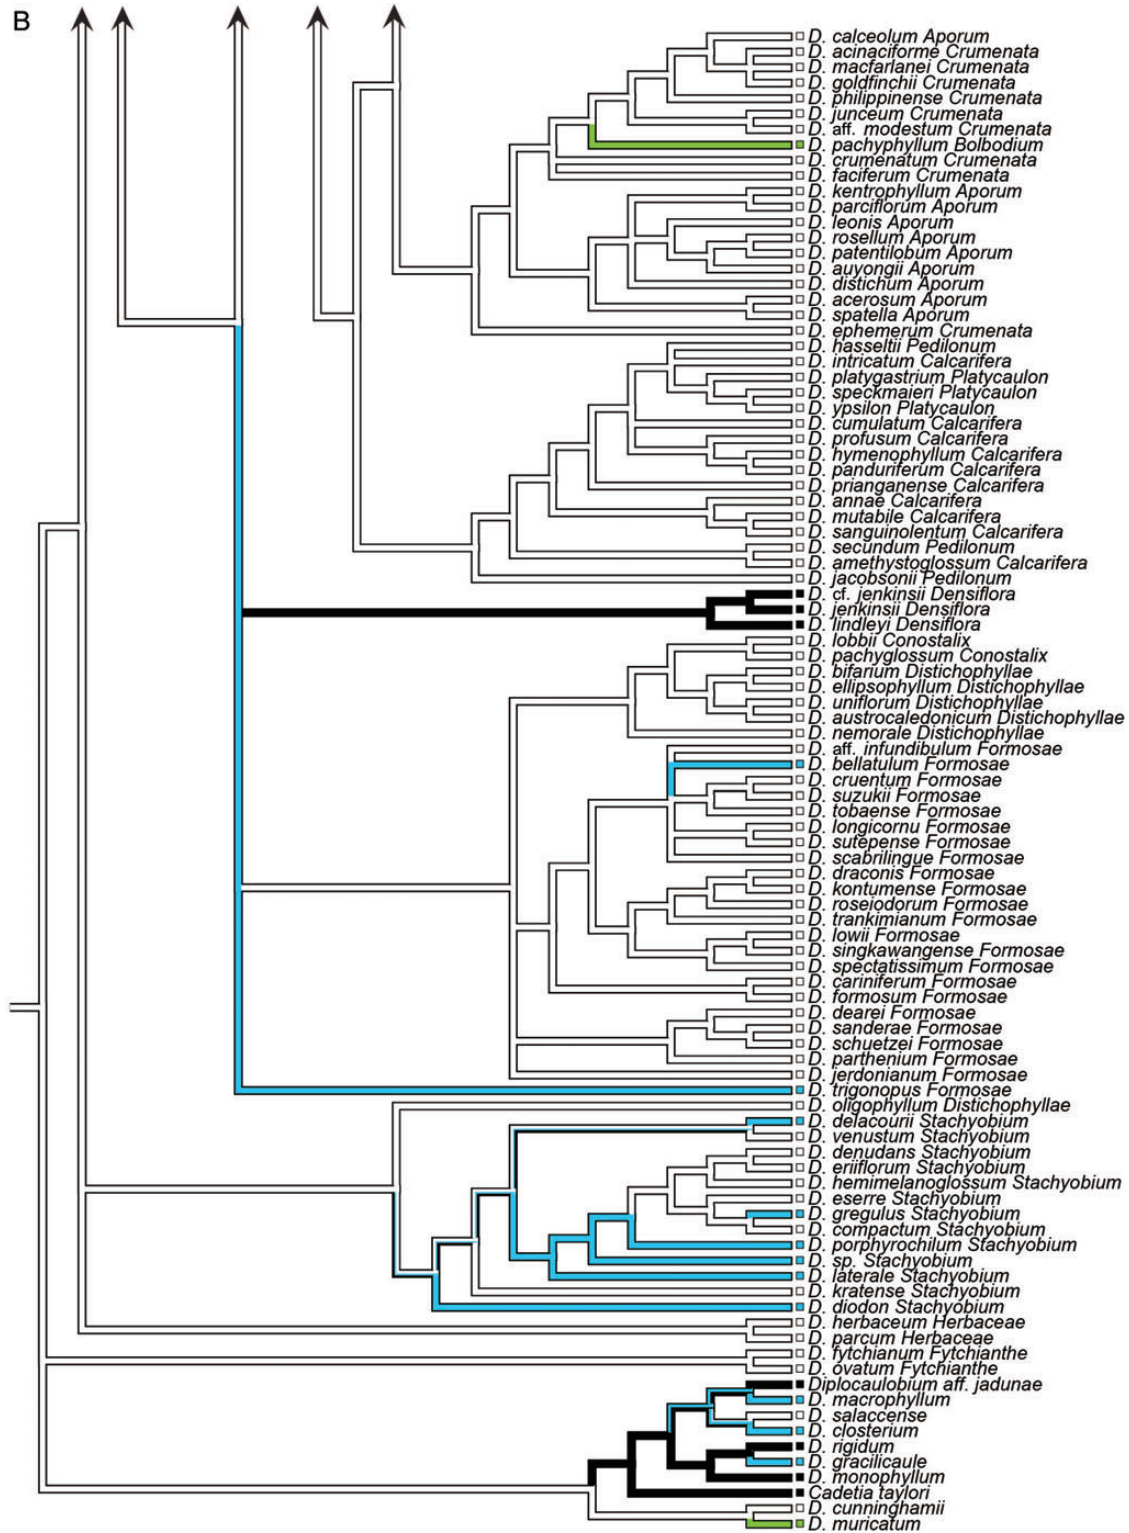

Figure 2. Continued.

14 times, twice, three times, and more than seven times, respectively. As for the evolution of leaf number, a character state bearing more than five leaves was suggested to be plesiomorphic in the Asian clade (Fig. 2B). The other character states of leaf number, namely, between three and five; two; and one, were inferred to evolve more than 10 times, once, and once, respectively.

## Discussion

### Phylogenetic relationships at the section level

Section *Dendrobium* is divided into three subclades. The first is the core clade, which includes the type species *Dendrobium moniliforme* (Clade A). The second is *D. albosanguineum*, included in Clade B, and the final subclade is *D. senile*, with a phylogenetic position that is unresolved. The possibility is suggested (PP72) that *D. senile* and *D. gibsonii* in section *Holochrysa* may form a clade. Furthermore, while there is a support of PP100 suggesting that these two species are sister groups to Clade A, due to the weak bootstrap support in MP analysis (BP < 50), they were not included in Clade A for the purposes of this study. In addition, Clade A also contains all species in section *Breviflores*, *D. chrysotoxum* in section *Densiflora*, all species in section *Stupososa*, and the majority of species in section *Holochrysa*, thus rendering section *Dendrobium* polyphyletic and paraphyletic. These results support the findings of Wongsawad et al. (2001, 2005) and Xiang et al. (2013).

Five species in section *Breviflores* (*Dendrobium aduncum*, *D. bifurcatum*, *D. hercoglossum*, *D. linguella* and *D. trantuanii*) are divided into three subclades within Clade A, making them a polyphyletic group. These results are consistent with the findings of Wongsawad et al. (2005) and Xiang et al. (2013). Two species in section *Stupososa* (*Dendrobium stuposum* and *D. praecinctum*) represent a monophyletic group within Clade A (BP100, PP100), supporting the findings of Wongsawad et al. (2005). Section *Holochrysa* was found to not be monophyletic, and its eight species (*Dendrobium atavus*, *D. chryseum*, *D. dixanthum*, *D. fimbriatum*, *D. henryi*, *D. lohohense*, *D. moschatum* and *D. pulchellum*) in Clade A are divided into six lineages. Further, a subclade comprising *D. braianense* and *D. capillipes* is placed within Clade B and the phylogenetic position of *D. gibsonii* is unresolved. These results are consistent with the analyses by Yukawa (2001), Wongsawad et al. (2001, 2005) and Xiang et al. (2013).

Section *Densiflora* was also found to not be monophyletic but rather to consist of three groups comprising the majority of Clade C, including the type species *D. densiflorum*, *D. chrysotoxum* belonging to Clade A, and Clade G, which is made up of *D. jenkinsii*, *D. cf. jenkinsii*

and *D. lindleyi*. The analyses by Yukawa (2001), Wongsawad et al. (2001, 2005) and Xiang et al. (2013) also demonstrated the polyphyly of section *Densiflora*. Section *Amblyanthus* was found to nest within Clade C. Four species of section *Amblyanthus* were found to be divided into two subclades within Clade C, and were polyphyletic, supporting the results of Yukawa (2001) and Wongsawad et al. (2005).

Section *Pedilonum* was found to not be monophyletic, its members forming eight polyphyletic groups within Clade D and three polyphyletic groups within Clade F. The type species of section *Pedilonum*, *D. secundum*, was included in Clade F. Our results were consistent with analyses by Yukawa (2001), Wongsawad et al. (2001, 2005) and Clements (2003, 2006), which also revealed section *Pedilonum* to not be monophyletic.

Section *Calcarifera* represents another non-monophyletic group, which is divided into three subclades within Clade D and six subclades within Clade F. Consistent with our results, Clements (2003, 2006) also found that the section was not monophyletic and that its members formed two distinct groups. It is clear that the type species *Dendrobium pedicellatum*, which was not investigated in this study, belongs to Clade F because a morphologically related species, *Dendrobium mutabile*, is placed in this clade.

Clade D was shown to also include sections *Dolichocentrum*, *Oxyglossum* and *Calyptrochilus*. Section *Dolichocentrum* was found to be polyphyletic, with its three species splitting into a lineage represented by *Dendrobium furcatum* and a subclade (BP100, PP100) made up of *Dendrobium auriculatum* and *D. papilio*.

Section *Oxyglossum* was also found to not be monophyletic. Its six constituent species were divided into two groups, one comprising *Dendrobium cyanocentrum*, *D. masarangense* subsp. *theionanthum* and *D. violaceum* (BP99, PP100) and the other comprising *D. cuthbertsonii*, *D. laevifolium* and *D. prasinum*, along with *D. bracteosum*, a member of section *Pedilonum* (BP73, PP100). Consistent with our results, Clements (2003, 2006) also found that section *Oxyglossum* was not monophyletic and that its members split into two groups.

Our results suggested that section *Calyptrochilus* forms a polyphyletic group made up of three subclades: the first comprising *Dendrobium aphanochilum* and *D. glomeratum* (BP98, PP100); the second comprising *D. lawesii*, *D. codonosepalum*, *D. trichostomum*, *D. mohlianum* and *D. melinanthum* (BP88, PP100); and the third comprising *D. erosum*.

Section *Aporum* was found to be polyphyletic, nesting within Clade E along with sections *Crumenata* and *Bolbodium*. The members form two subclades: the first comprising nine species (BP83, PP100) and the second comprising *Dendrobium calceolum*. The monophyly of

the first subclade was suggested by Yukawa (2001) and Wongsawad et al. (2001, 2005).

Section *Crumenata* was also found to nest within Clade E and to not be monophyletic. Its species are divided into two subclades: the first including section *Bolbodium* and parts of section *Aporum* (BP92, PP100) and the second representing the earliest diverging clade within Clade E, comprising *Dendrobium ephemerum*. Analyses by Yukawa (2001) and Clements (2003, 2006) also suggested the first of these subclades to be paraphyletic.

Section *Distichophyllae* was found to not be monophyletic, with its members splitting into a core clade (Clade H) containing the type species of the section, *Dendrobium uniflorum*, and the earliest diverging clade within Clade K represented by *D. oligophyllum*, which is likely a sister group to section *Stachyobium*. Further, in Clade H, two species of section *Conostalix*, *Dendrobium lobbii* and *D. pachyglossum*, were nested within members of section *Distichophyllae*. Section *Conostalix* is probably monophyletic (BP53, PP100).

Members of section *Formosae* were scattered into four lineages: Clade I, Clade J and two unplaced species, *D. jerdonianum* and *D. trigonopus*. Clade I, which contains the type species of the section, *D. formosum*, comprises only species of section *Formosae* (BP100, PP100). Clade J similarly comprises only species of section *Formosae* (BP100, PP100). While the possibility that these four groups represent a monophyletic lineage cannot be ruled out, it is likely that they are polyphyletic. Analyses by Wongsawad et al. (2005) and Clements (2006) also identified two clades within Section *Formosae* corresponding to Clades I and J.

There is a strong possibility that section *Stachyobium* forms a monophyletic group within Clade K (BP93, PP100). Consistent with our results, monophyly of section *Stachyobium* was also suggested by analyses by Yukawa (2001), Wongsawad et al. (2001, 2005), Clements (2006) and Xiang et al. (2013). Furthermore, it is evident that section *Stachyobium* is a sister group to *D. oligophyllum* in section *Distichophyllae* (BP99, PP100).

Section *Herbaceae* comprises only two species, *Dendrobium herbaceum* and *D. parcum*. We found that this section is clearly monophyletic because the two species constitute Clade L (BP96, PP100). Similarly, it is highly probable that section *Fytchianthe* represents a monophyletic lineage because *Dendrobium fytchianum* and *D. ovatum*, members of this section, constitute Clade M (BP100, PP100). While not strongly supported in statistical terms (BP < 50, PP59), Clade M may represent the earliest divergent clade within the Asian clade. Similarly supported by our results, analyses by Wongsawad et al. (2001, 2005) also indicate the possibility that section *Fytchianthe* is the earliest divergent clade within the

Asian clade. Our analyses further indicate that sections *Herbaceae* and/or *Stachyobium* may represent the second-earliest divergent clade within the Asian clade after section *Fytchianthe*.

## Evolution of morphological characters

**Vegetative stems.** The vast majority of species belonging to Clades A, D, F, H, I, J, L and M, and several species in Clades C and K have terete, non-succulent vegetative stems. Results of ancestral state reconstruction analysis showed that this character state represents a plesiomorphy of the Asian clade (Fig. 2A).

Species with a pseudobulbous, heteroblastic, succulent stem in which from one to a few internodes on the upper portions of vegetative stems thicken to become pseudobulbs, account for all species in section *Bolbodium* and some members of sections *Densiflora*. Among species analysed in this study, the heteroblastic stem is exhibited by *Dendrobium pachyphyllum* (section *Bolbodium*) in Clade E, *D. lindleyi*, *D. jenkinsii* and *D. cf. jenkinsii* (all in section *Densiflora*) in Clade G. Results of ancestral state reconstruction analysis showed that this character state likely evolved twice in the Asian clade (Fig. 2A).

*Dendrobium brymerianum*, *D. chrysocrepis*, *D. harveyanum* (both in section *Dendrobium*) and *D. chrysotoxum* (section *Densiflora*) in Clade A, *D. albosanguineum* (section *Dendrobium*) and *D. braianense* and *D. capillipes* (both in section *Holochrysa*) in Clade B, *D. cf. griffithianum*, *D. farmeri*, *D. griffithianum*, *D. guibertii* and *D. palpebrae* (all in section *Densiflora*) in Clade C, all species of section *Oxyglossum* in Clade D, *D. bellatulum* (section *Formosae*) in Clade I, *D. delacourii*, *D. diodon*, *D. gregulus*, *D. porphyrochilum*, *D. laterale* and *Dendrobium* sp. (all in section *Stachyobium*) in Clade K and *D. trigonopus* (section *Formosae*), an unplaced taxon, have a clavate, non-heteroblastic, succulent stem. Results of ancestral state reconstruction analysis indicated that this character state evolved more than 14 times in the Asian clade (Fig. 2A).

All species of section *Crumenata*, and *Dendrobium hancockii* and *D. cf. hancockii* (both in section *Dendrobium*) exhibit a basally bulged stem characterized by particular thickening of several internodes positioned on lower portions of vegetative stems. Results of ancestral state reconstruction analysis showed that this character state represents an apomorphy, resulting from two independent evolutionary events within the Asian clade (Fig. 2A).

The stems of the majority of members of section *Calcarifera* have elliptical cross-sections, while the stems of all members of section *Platycaulon* are entirely flattened. A few species belonging to sections *Breviflores* and *Densiflora* also have flattened stems. Among species analysed in this study, in addition to species of section

*Platycaulon* (Clade F), *D. trantuanii* (section *Breviflores*) in Clade A and *D. sulcatum* (section *Densiflora*) in Clade C also had flattened stems. Results of ancestral state reconstruction analysis showed that this character state evolved three times in the Asian clade (Fig. 2A).

A further apomorphy of the vegetative stem is thin, wiry stems, observed in all species of sections *Aporum* and *Dolichocentrum* and a few species of sections *Dendrobium*, *Calcarifera*, *Conostalix* and *Pedilonum*. Among species investigated in this study, in addition to species of sections *Aporum* and *Dolichocentrum*, thin and wiry stems were shared by *Dendrobium leptocladum* (section *Dendrobium*) in Clade A, *Dendrobium lancifolium* (section *Calcarifera*) and *Dendrobium* aff. *ramosii* (section *Pedilonum*) in Clade D and *D. lobbii* (section *Conostalix*) in Clade H. Results of ancestral state reconstruction analysis suggested that this character state evolved more than seven times in the Asian clade (Fig. 2A). Species belonging to section *Aporum* have succulent leaves, while other species with thin and wiry stems have fleshy roots. This suggests that, in species with thin and wiry stems, the components responsible for water storage have shifted from the stems to the leaves or roots.

**Shoot architecture.** The majority of species in the genus *Dendrobium* exhibit an architecture ubiquitously observed in perennial herbs in which vegetative shoots emerge in a repeated sympodial branching pattern from nodes on basal portions of the vegetative stem and produce roots also at the stem base. However, all species of section *Herbaceae* and a few species of sections *Dendrobium*, *Calcarifera*, *Dolichocentrum* and *Crumenata* produce vegetative shoots in a sympodial branching pattern from nodes on the upper parts of the stem, forming ramified stems, whereby roots do not grow from basal portions of new shoots. Among the species examined in this study, in addition to species of section *Herbaceae*, this architecture was observed in *Dendrobium falconeri* and *D. hancockii* (both in section *Dendrobium*) in Clade A; *D. chameleon* (section *Calcarifera*), *D. furcatum* (section *Dolichocentrum*) and *D. victoria-reginae* (section *Calcarifera*) in Clade D; and *D. junceum* (section *Crumenata*) in Clade E. This character state is not present in Clade M, which likely represents the earliest divergent clade within the Asian clade. In addition, given that this character state is only observed in a small number of species in a few lineages of both Asian and Australasian clades (Wood 2006), it is likely that ramified stems represent an apomorphy for the Asian clade, resulting from at least four distinct evolutionary events.

Although reproductive shoots are produced by axillary branching from vegetative shoots in most *Dendrobium*

species, all species of sections *Stachyobium*, *Herbaceae* and *Fytchianthe* have terminal buds of vegetative shoots that develop into reproductive shoots. In this study, such a terminal inflorescence was observed in all species belonging to Clades M, L and K, which likely represent the earliest divergent clades within the Asian clade. Dressler (1981) proposed that terminal inflorescence is historically primary, being found in the most primitive orchid. Given that members of the genus *Epigeneium*, which represents the earliest divergence within subtribe *Dendrobiinae*, also exhibit a terminal inflorescence, terminal inflorescences may represent a plesiomorphy for the Asian clade.

**Roots.** Given that almost all Asian clade species have roots with a smooth, shiny white surface and that the majority of the sister Australasian clade species also have smooth roots, it appears that smooth roots represent a plesiomorphy for the Asian clade. In contrast, a number of species belonging to Clade F (*Dendrobium annae*, *D. cumulatum*, *D. hymenophyllum*, *D. intricatum*, *D. mutabile*, *D. panduriferum*, *D. profusum* and *D. sanguinolentum* in section *Calcarifera* and *D. platygastrium*, *D. speckmaieri* and *D. ypsilon* in section *Platycaulon*) have verrucose roots. All members of section *Brevisaccata* in the Australasian clade and some species of the genus *Epigeneium* also exhibit this feature. Such roots certainly evolved three times in the subtribe *Dendrobiinae*. However, this rough surface feature has no known function, except for increasing the absorptive surface of the root (Wood 2006).

**Leaves.** While almost all species belonging to the Asian clade have conduplicate leaves with both adaxial and abaxial surfaces, all species in section *Aporum* and some species in section *Crumenata* have laterally flattened or terete leaves in which the adaxial surface has been reduced, leaving a unifacial leaf consisting only of the abaxial surface. This feature is accompanied by thickening of the mesophyll, and these character states represent a xerophytic adaptation. In fact, the species with unifacial leaves generally grow as epiphytes in dry habitats of tropical Asia (Yukawa and Uehara 1996). Among the species analysed in this study, all species in section *Aporum* and section *Crumenata* species *Dendrobium acinaciforme*, *D. macfarlanei*, *D. goldfinchii*, *D. philippinense*, *D. junceum* and *D. aff. modestum* in Clade E exhibit a unifacial leaf. Since evolution of a unifacial leaf occurred only in Clade E in the Asian clade, it represents an apomorphy resulting from one or a few evolutionary events.

Members of the genus *Dendrobium* exhibit two shedding patterns: a deciduous pattern, in which leaf life-span

is shorter than 1 year and stems lose all leaves temporarily, and an evergreen pattern, in which leaf life-span is longer than 1 year and stems retain their leaves at all times. While the vast majority of species are evergreen, all species in sections *Herbaceae*, *Fytchianthe* and *Stachyobium* and some members in sections *Dendrobium* and *Holochrysa* are deciduous. Among species investigated in this study, in addition to species of sections *Herbaceae*, *Fytchianthe* and *Stachyobium*, section *Dendrobium* species *D. aphyllum*, *D. crystallinum*, *D. pendulum*, *D. wardianum*, *D. amoenum*, *D. anosmum*, *D. bensoinae*, *D. crepidatum*, *D. devonianum*, *D. gratiosissimum*, *D. lituiflorum*, *D. parishii*, *D. primulinum*, *D. transparens*, *D. unicum* and *D. dixanthum* (section *Holochrysa*) in Clade A, along with *D. albosanguineum* (section *Dendrobium*), *D. capillipes* (section *Holochrysa*) in Clade B and *D. senile* (section *Dendrobium*), with unresolved phylogenetic position, are all deciduous. Furthermore, while members of the Australasian clade as well as *Epigeneium* and *Bulbophyllum*, allied genera to *Dendrobium*, have evergreen leaves, given that species of sections *Fytchianthe*, *Herbaceae* and *Stachyobium*, which likely are the earliest divergent clades within the Asian clade, are deciduous, deciduousness may represent a plesiomorphy for the Asian clade.

Results of ancestral state reconstruction analysis showed that a stem with more than five leaves represents a plesiomorphy of the Asian clade and that reduction of leaf number likely evolved more than 12 times (Fig. 2B). As shown in Fig. 2A and B, the species with less than six leaves on each stem usually exhibit pseudobulbous, heteroblastic, succulent or clavate, non-heteroblastic, succulent stems except for *D. aff. densiflorum*, *D. amabile*, *D. densiflorum*, *D. sulcatum* and *D. thyrsoflorum* (all in section *Densiflora*) in Clade C. Furthermore, leaves of these species are either succulent or deciduous. Yukawa and Uehara (1996) and Wood (2006) suggested that these combinations of character states show adaptation to a xeric environment.

Schlechter (1912), in his infrageneric classification system of *Dendrobium*, emphasized the presence or absence of leaf sheaths as a cardinal diagnostic character at the subgenus level. In species with the above-mentioned succulent stems producing a small number of leaves in the upper part, leaf sheaths do not develop. However, in species that produce non-succulent stems, leaf sheaths do not develop in the uppermost leaves, but do develop in lower leaves. Consequently, reduction of the leaf sheath in the uppermost leaves is a common character state both in the succulent and non-succulent stem species, and it is not appropriate to use the presence or absence of leaf sheaths as a character for classification at least in the Asian clade.

**Anatomical characters of vegetative organs.** Yukawa and Uehara (1996) demonstrated that modifications in size and number of parenchymatous cells of vegetative stems substantially contributed to vegetative diversification in *Dendrobium*. This observation implies that a simple structural adjustment can result in a major modification of growth habit in this group. They also found that several anatomical characters associated with xeromorphy, such as a thick outer wall of epidermal cells on the stem surface and a thick sclerenchymatous cap on vascular bundles in the stem evolved in members of sections *Aporum* and *Crumenata*. In other words, these character states are likely to have evolved in the common ancestor of Clade E. Acquisition of xeromorphic anatomical characters in this clade may have facilitated evolution of unique vegetative characters suited to dry environments such as a succulent, laterally flattened leaf and a wiry or basally bulged stem.

Namba and Lin (1981a, b), Singh (1986) and Morris et al. (1996) investigated the anatomical characters of roots of *Dendrobium*. Morris et al. demonstrated that root characteristics including the number of layers in the velamina are not useful characters to use in determining sectional relationships.

**Reproductive organs.** All species of section *Densiflora* and most members of section *Dendrobium* have velvety lips with many papillae on the surface. Among species analysed in this study, all Clade A species with the exception of *D. unicum* and *D. lamyaiiae* in section *Dendrobium*, all Clade B, C and G species, and *D. gibsonii* exhibit this character state. When *Dendrobium* flowers are stained with neutral red, which is taken up by osmophores, or odour-producing cells (Stern et al. 1986), the papillae of the above-listed species are strongly stained (Yukawa 1993). Consequently, it is likely that the papillae on the lip surface accumulate substances responsible for fragrance (Müller 1935). Observation of the near-ultraviolet (near-UV) reflectance of the flowers using near-UV reflectance photography reveals that the parts with papillae absorb near-UV, while other areas of the perianth lobes reflect near-UV, resulting in distinct high-contrast patterns (Yukawa 1993; Indsto and Weston 2000). Given that this combination of characteristics is typical of bee-pollinated flowers, we demonstrate that the dense packing of papillae on lip surfaces represents a character state that evolved in adaptation to bee pollination. The only *Dendrobium* species producing lips with dense papillae for which pollinators have been observed is *D. anosmum*, which two species of *Apis* are known to pollinate (Burkill 1919). Since lip surfaces

with dense papillae are not observed in species of the Australasian clade or in Clades K, L and M, which likely represent the earliest divergent clades within the Asian clade, this character state was probably acquired after the divergence of the Asian clade. However, it is unclear how many evolutionary events have resulted in the character state, because phylogenetic relationships of Clades A, B, C and G have not been resolved.

Meanwhile, specialization has occurred in terms of flowering behaviour. Reproductive shoots of *Dendrobium* generally branch sympodially from vegetative shoots and disappear immediately after flowering. However, in all species in Clade E, namely, members of sections *Aporum*, *Bolbodium* and *Crumenata*, the reproductive shoots remain alive even after flowering and continue to flower repeatedly. There is a high probability that the repeated flowering behaviour was acquired by a common ancestor of Clade E. Further, all species of section *Bolbodium* and some species of sections *Crumenata* and *Aporum* in this clade exhibit gregarious flowering in which, after the flower has differentiated, its growth is suspended at the bud stage and all flowers begin to grow and then bloom at once when the temperature decreases to a certain level or when the difference between day-time and night-time temperatures narrows to a certain point (Seifriz 1923; Coster 1925; Gerlach 1992). This behaviour is observed, for example, in *D. pachyphyllum* (section *Bolbodium*), *D. crumenatum* (section *Crumenata*), *D. ephemerum* (section *Crumenata*), *D. acerosum* (section *Aporum*) and *D. spatella* (section *Aporum*). It is possible that acquisition of repeated flowering in the common ancestor of Clade E provided further character evolution that increased plant attractiveness to pollinators, because it enabled an individual plant to have numerous buds at once. Acquisition of repeated flowering thus may trigger the evolution of gregarious flowering.

### Reappraisal of infrageneric classification

There is no single criterion, but rather, several options for deciding what level of monophyletic unit warrants designation as a genus. In order to fulfil the phylogenetic consistency and conservation of a widely accepted concept of the genus *Dendrobium*, Yukawa *et al.* (1993, 1996, 1999, 2000), Yukawa (2001), Burke *et al.* (2008), Adams (2011) and Schuiteman (2011) have recommended expanding the genus *Dendrobium* to include the genera *Cadetia*, *Diplocaulobium* and *Flickingeria*. In contrast, Clements (2003, 2006) subdivided *Dendrobium* and established many new genera to recover the monophyly of the genus. The advantages and disadvantages of these two approaches were discussed by Yukawa *et al.* (1999) and Schuiteman and Adams (2011), who concluded that the former approach has greater merit.

Here, we follow the former approach and examine the infrageneric classification system of *Dendrobium* proposed by Wood (2006).

We demonstrated that a number of sections used by Wood (2006) are not monophyletic. In order to restore the monophyly of these groups, a revised system at the section level is necessary. Clades A through M defined in this study were all strongly supported, indicating that they are stable units whose monophyly will continue to be supported even if the sampling intensity and gene regions analysed were increased. Furthermore, given that considerable numbers of clades roughly correspond to traditionally used sections, it would seem reasonable to assign, for the most part, Clades A through M to the section level.

We found that in Clade A, section *Dendrobium* is a paraphyletic group comprising all species in sections *Breviflores* and *Stuposa*, most species in section *Holochrysa* and *D. chrysotoxum* in section *Densiflora*. If we recognize these heterogeneous elements at the section level, section *Dendrobium* also must be subdivided. As sections *Breviflores*, *Stuposa*, *Holochrysa* and *D. chrysotoxum* in *Densiflora* do not deviate from a broad concept of section *Dendrobium*, it would be appropriate to redefine section *Dendrobium* as the range of Clade A and to include sections *Breviflores* and *Stuposa*, and most species in section *Holochrysa*, and *D. chrysotoxum* of section *Densiflora* in section *Dendrobium*. Schuiteman (2011) also suggested that section *Breviflores* is polyphyletic and should be included in section *Dendrobium*. Further, Xiang *et al.* (2013) proposed to subsume these three sections and *D. chrysotoxum* into section *Dendrobium*. Our analyses indicated that *D. gibsonii* (section *Holochrysa*) and *D. senile* (section *Dendrobium*) may form a monophyletic group with Clade A (BP < 50, PP100). At present, it is appropriate to include these two species in section *Dendrobium*.

Clade B can be characterized by the following combination of characters: clavate, non-heteroblastic, succulent stems; long flowering stems produced from the upper part of vegetative stems; lip with numerous papillae on the adaxial surface; tapered anther cap; and leaf sheath with brownish margins. Among these characters, leaf sheath with brownish margins represents synapomorphy of this clade. While Clade B itself is strongly supported (BP100, PP100), its relationship to other clades remains to be resolved. Therefore, it would seem appropriate to treat Clade B as an independent section. Clade B is comprised of members of sections *Dendrobium* and *Holochrysa*, both of whose type species belong to Clade A. Given that no name corresponding to the three species constituting Clade B currently exists, a new section name will have to be assigned.



Clade C comprises sections *Densiflora* and *Amblyanthus*, both of which are not monophyletic in the clade. *Dendrobium microglaphys* of section *Amblyanthus* occupies a nested position among members of section *Densiflora* and lacks scales outside the perianth lobes that characterize section *Amblyanthus*; instead, it has reduced leaf sheaths and pendulous flowering stems, both of which are diagnostic characters of section *Densiflora*. Consequently, it is reasonable to transfer *D. microglaphys* to section *Densiflora*. Meanwhile, the members of the basal subclade of Clade C, which includes *Dendrobium melanostictum*, the type species of section *Amblyanthus*, share features such as scales outside the perianth lobes, short racemes, and a peculiar scaly covering of the flowers and a backward-pointing lip appendage. Therefore, this subclade corresponds to section *Amblyanthus* and the rest of Clade C can be defined as section *Densiflora*.

Clade D comprises sections *Pedilonum*, *Calcarifera*, *Oxyglossum*, *Calyptrochilus* and *Dolichocentrum*. Since sections *Pedilonum*, *Calcarifera*, *Oxyglossum* and *Dolichocentrum* are not monophyletic, redefinition of these sections is necessary. If we conserve these sections, establishment of a large number of new sections is required. To avoid this complexity, we suggest designating Clade D as a single section. For this purpose, the section names *Pedilonum* and *Calcarifera* are not appropriate since their type species belong to Clade F. Therefore, the oldest available section name for Clade D is *Calyptrochilus*. An elongated mentum characterizes all species in this clade, while this character also defines Clade F and several species in other clades.

Clade E comprises sections *Aporum*, *Crumenata* and *Bolbodium*, the first two of which were found to not be monophyletic. As in the case of Clade D, conserving these two section names requires the establishment of multiple new sections. Thus, it is better to treat Clade E as a single section. The oldest available name corresponding to this clade is section *Aporum*. Clade E species have the following synapomorphies: a thick outer wall of epidermal cells on the stem surface and a thick sclerenchymatous cap on vascular bundles in the stem (Yukawa and Uehara 1996), and repeated flowering behaviour from the same reproductive shoot. Schuiteman (2011) also suggested that sections *Aporum*, *Crumenata* and *Bolbodium* should be treated as a single section.

Clade F comprises sections *Pedilonum*, *Calcarifera* and *Platycaulon*, the first two of which were found to not be monophyletic. Again, to avoid complexity by naming many new sections, it is reasonable to designate Clade F as a single section. The oldest available name corresponding to this clade is section *Pedilonum*. A shared character for Clade F is an elongated mentum, but this character also appeared in other clades, as mentioned previously.

The three species constituting Clade G have previously been treated as section *Densiflora*. Since we redefine section *Densiflora* as a subclade in Clade C where the type species is included, this section name cannot be used in Clade G. While the monophyly of this clade is strongly supported (BP100, PP100), its relationship to other clades remains to be resolved. Consequently, it is appropriate to deal with Clade G as an independent section. Given that no name corresponding to the three species constituting Clade G currently exists, a new section name will have to be assigned. Xiang et al. (2013) also suggested a separate status for a clade comprising *D. jenkinsii* and *D. lindleyi*. Members of this clade share the following combination of characters: pseudobulbous, heteroblastic, succulent stem, single leaf on the stem, and a few long flowering stems from the apical part of the vegetative stem. Among these characters, a single leaf represents the synapomorphy of this clade.

Clade H consists of members of sections *Distichophyllae* and *Conostalix*. As the latter section is nested within the first, the first section becomes paraphyletic. Except for thinner vegetative stems in section *Conostalix*, there is no obvious character to distinguish the two sections. Therefore, we deem it appropriate to redefine section *Distichophyllae* as the range of Clade H.

Clades I and J as well as unplaced species *D. jerdonianum* and *D. trigonopus* compose section *Formosae*. In addition to the definite monophyletic status of Clades I and J, it cannot be ruled out that some or all clades of this section along with section *Distichophyllae* form a monophyletic group. Since further analyses may resolve the ambiguous relationships of these clades, we suspend taxonomic treatment of section *Formosae* for the moment.

Clade K comprises section *Stachyobium* and *D. oligophyllum* of section *Distichophyllae*, which is the earliest divergent lineage in this clade. Re-examination of *D. oligophyllum* showed that the morphological characters of this species are consistent with the definition of section *Stachyobium* except for the long life-span of the leaf in this species. We thus transfer *D. oligophyllum* to section *Stachyobium*, and by this treatment, Clade K coincides with section *Stachyobium*. While the species of section *Stachyobium* share terminal inflorescences, we did not identify any synapomorphies of this section.

Clades L and M correspond to sections *Herbaceae* and *Fytchianthe*, respectively, endorsing the validity of the current definition of these sections. The species of section *Herbaceae* are characterized by ramified stems, terminal inflorescences and deciduous leaves. The species of section *Fytchianthe* are characterized by terminal inflorescences and deciduous leaves.

The scope of this study did not include the Australasian clade, the other major clade in genus *Dendrobium*. While

a number of molecular phylogenetic studies have been conducted for this clade as well (Y. T. unpubl. res.; Yukawa et al. 1993, 1996, 2000; Yukawa 2001; Clements 2003, 2006; Burke et al. 2008), no attempt has been made to comprehensively analyse this clade as a whole. A consistent infrageneric classification of this genus should be proposed after combining the results of a phylogenetic analysis of both Asian and Australasian clades.

## Sources of Funding

This work was partially supported by a Grant-in-Aid for Scientific Research (24370040 to T.Y.) from the Ministry of Education, Culture, Sports, Science and Technology, Japan.

## Contributions by the Authors

T.Y., T.T., T.H., S.K. and H.I. conceived and designed the study. T.Y., T.T., P.W., A.S., T.N., S.S., S.K. and N.S. performed sequence and phylogenetic analyses. T.Y. and T.T. primarily wrote the manuscript with contributions from all the authors.

## Conflicts of Interest Statement

None declared.

## Acknowledgements

We thank H. Okuizumi and D. Hirose for critical comments, K. Suzuki and K. Komura for plant cultivation, and T. Fujimoto, K. Kita, T. Sobu, K. Murase, Y. Matsuo and T. Yamada for technical support.

## Supporting Information

The following Supporting Information is available in the online version of this article –

**Figure S1.** Consensus phylogram obtained from 100 754 Bayesian trees based on ITS sequences. Values below and above branches indicate percentage bootstrap values from maximum parsimony analysis and Bayesian posterior probabilities, respectively.

**Figure S2.** Consensus phylogram obtained from 119 935 Bayesian trees based on *matK* sequences. Values below and above branches indicate percentage bootstrap values from maximum parsimony analysis and Bayesian posterior probabilities, respectively.

## Literature Cited

Adams PB. 2011. Systematics of Dendrobiinae (Orchidaceae), with special reference to Australian taxa. *Botanical Journal of the Linnean Society* **166**:105–126.

- Barkman TJ, Lim SH, Salleh KM, Nais J. 2004. Mitochondrial DNA sequences reveal the photosynthetic relatives of *Rafflesia*, the world's largest flower. *Proceedings of the National Academy of Sciences of the USA* **101**:787–792.
- Bentham G, Hooker JD. 1883. *Genera plantarum* 3. London: Reeve and Co.
- Brieger FG. 1981. Subtribus Dendrobiinae. In: Brieger FG, Maatsch R, Sanghas K, eds. *R. Schlechter Die orchideen*, 3rd edn (11–12). Berlin: Parey, 636–752.
- Burke JM, Bayly MJ, Adams PB, Ladiges PY. 2008. Molecular phylogenetic analysis of *Dendrobium* (Orchidaceae), with emphasis on the Australian section *Dendrocoryne*, and implications for generic classification. *Australian Systematic Botany* **21**:1–14.
- Burkill IH. 1919. Some notes on the pollination of flowers in the Botanic Gardens, Singapore, and other parts of the Malay Peninsula. *Gardens' Bulletin of the Straits Settlements* **2**:165–176.
- Chase MW, de Bruijn AY, Cox AV, Reeves G, Rudall PJ, Johnson MAT, Eguiarte LE. 2000. Phylogenetics of Asphodelaceae (Asparagales): an analysis of plastid *rbcL* and *trnL-F* DNA sequences. *Annals of Botany* **86**:935–951.
- Clements MA. 2003. Molecular phylogenetic systematics in the Dendrobiinae (Orchidaceae), with emphasis on *Dendrobium* section *Pedilonum*. *Telopea* **10**:247–298.
- Clements MA. 2006. Molecular phylogenetic systematics in Dendrobieae (Orchidaceae). *Aliso* **22**:465–480.
- Coster L. 1925. Periodische Blutenerscheinungen in der Tropen. *Annales du Jardin Botanique Buitenzorg* **35**:125–162.
- DeBry RW, Olmstead RG. 2000. A simulation study of reduced tree-search effort in bootstrap resampling analysis. *Systematic Biology* **49**:171–179.
- Dressler RL. 1981. *The orchids: natural history and classification*. Cambridge: Harvard University Press.
- Farris JS, Källersjö M, Kluge AG, Bult C. 1994. Testing significance of incongruence. *Cladistics* **10**:315–319.
- Farris JS, Källersjö M, Kluge AG, Bult C. 1995. Constructing a significance test for incongruence. *Systematic Biology* **44**:570–572.
- Fitch WM. 1971. Toward defining the course of evolution: minimum change for a specific tree topology. *Systematic Zoology* **20**:406–416.
- Gerlach WWP. 1992. Flowering behaviour of ephemeral orchids of Western Samoa. 1. Flowering periodicity. *Gartenbauwissenschaft* **57**:219–222.
- Hidayat T, Yukawa T, Ito M. 2005. Molecular phylogenetics of subtribe Aeridinae (Orchidaceae): insights from plastid *matK* and nuclear ribosomal ITS sequences. *Journal of Plant Research* **118**:271–284.
- Huelsenbeck JP, Ronquist F. 2001. MRBAYES: Bayesian inference of phylogenetic trees. *Bioinformatics* **17**:754–755.
- Indsto JO, Weston PH. 2000. Near-ultraviolet reflectance in *Dendrobium* (Orchidaceae). In: Wilson KL, Morrison DA, eds. *Monocots: systematics and evolution*. Collingwood: CSIRO, 326–334.
- Johnson LA, Soltis DE. 1998. Assessing congruence: empirical examples from molecular data. In: Soltis DE, Soltis PS, Doyle JJ, eds. *Molecular systematics of plants II: DNA sequencing*. Boston: Kluwer Academic Publishers, 297–348.



**Appendix 1.** List of *Dendrobium* taxa and GenBank IDs.

| <b>Species</b>              | <b>Section</b>         | <b>Voucher</b> | <b>ITS</b> | <b>matK</b> |
|-----------------------------|------------------------|----------------|------------|-------------|
| <i>D. acerosum</i>          | <i>Aporum</i>          | Yukawa04-32    | AB847639   | AB847678    |
| <i>D. acinaciforme</i>      | <i>Crumenata</i>       | TBG120483      | AB847640   | AB847679    |
| <i>D. aduncum</i>           | <i>Breviflores</i>     | TBG134842      | AB593484   | AB847680    |
| <i>D. aff. anosmum</i>      | <i>Dendrobium</i>      | Ting H19       | AB593490   | AB847686    |
| <i>D. aff. densiflorum</i>  | <i>Densiflora</i>      | TBG159449      | AB593485   | AB847681    |
| <i>D. aff. infundibulum</i> | <i>Formosae</i>        | TBG128905      | AB593486   | AB847682    |
| <i>D. aff. modestum</i>     | <i>Crumenata</i>       | TBG119268      | AB847642   | AB847683    |
| <i>D. aff. moniliforme</i>  | <i>Dendrobium</i>      | TBG124453      | AB593488   | AB847684    |
| <i>D. aff. ramosii</i>      | <i>Pedilonum</i>       | HBG4335        | AB593492   | AB847687    |
| <i>D. aff. signatum</i>     | <i>Dendrobium</i>      | TBG118279      | AB593489   | AB847685    |
| <i>D. alaticaulinum</i>     | <i>Pedilonum</i>       | TBG135586      | AB593493   | AB847688    |
| <i>D. albosanguineum</i>    | <i>Dendrobium</i>      | TBG122507      | AB593494   | AB847689    |
| <i>D. amabile</i>           | <i>Densiflora</i>      | TBG111421      | AB593495   | AB847690    |
| <i>D. amethystoglossum</i>  | <i>Calcarifera</i>     | TBG120501      | AB593496   | AB847691    |
| <i>D. amoenum</i>           | <i>Dendrobium</i>      | TBG159411      | AB593497   | AB847692    |
| <i>D. annae</i>             | <i>Calcarifera</i>     | TBG111422      | AB593498   | AB847693    |
| <i>D. anosmum</i>           | <i>Dendrobium</i>      | TBG118511      | AB593499   | AB847694    |
| <i>D. aphanochilum</i>      | <i>Calyptrochilum</i>  | TBG142252      | AB593500   | AB847695    |
| <i>D. aphrodite</i>         | <i>Dendrobium</i>      | TBG122797      | AB593501   | AB847696    |
| <i>D. aphyllum</i>          | <i>Dendrobium</i>      | TBG122508      | AB593539   | AB847736    |
| <i>D. atavus</i>            | <i>Holochrysa</i>      | TBG159413      | AB593502   | AB847697    |
| <i>D. auriculatum</i>       | <i>Dolichocentrum</i>  | TBG120492      | AB593503   | AB847698    |
| <i>D. austrocaledonicum</i> | <i>Distichophyllae</i> | TBG130055      | AB593504   | AB847699    |
| <i>D. auyongii</i>          | <i>Aporum</i>          | TBG123341      | AB847643   | AB847700    |
| <i>D. bellatulum</i>        | <i>Formosae</i>        | TBG133256      | AB847644   | AB847701    |
| <i>D. bensoniae</i>         | <i>Dendrobium</i>      | TBG128899      | AB593505   | AB847702    |
| <i>D. bifarium</i>          | <i>Distichophyllae</i> | TBG159414      | AB593506   | AB847703    |
| <i>D. bifurcatum</i>        | <i>Breviflores</i>     | TBG157293      | AB593507   | AB847704    |
| <i>D. bracteosum</i>        | <i>Pedilonum</i>       | TBG102743      | AB593509   | AB847705    |
| <i>D. braianense</i>        | <i>Holochrysa</i>      | TBG159424      | AB593510   | AB847706    |
| <i>D. brymerianum</i>       | <i>Dendrobium</i>      | TBG118826      | AB593511   | AB847707    |
| <i>D. calcaratum</i>        | <i>Pedilonum</i>       | TBG125164      | AB593512   | AB847708    |
| <i>D. calceolum</i>         | <i>Aporum</i>          | TBG122494      | AB593513   | AB847709    |
| <i>D. caliculi-mentum</i>   | <i>Pedilonum</i>       | TBG118610      | AB593514   | AB847710    |
| <i>D. capillipes</i>        | <i>Holochrysa</i>      | TBG128878      | AB593515   | AB847711    |
| <i>D. cariniferum</i>       | <i>Formosae</i>        | TBG128900      | AB847645   | AB847712    |
| <i>D. catenatum</i>         | <i>Dendrobium</i>      | TBG159450      | AB593517   | AB847713    |
| <i>D. catillare</i>         | <i>Pedilonum</i>       | TBG124769      | AB847646   | AB847714    |

Continued

## Appendix 1. Continued

| Species                      | Section                | Voucher       | ITS      | matK     |
|------------------------------|------------------------|---------------|----------|----------|
| <i>D. cf. bensoniae</i>      | <i>Dendrobium</i>      | 036193-B      | AB847647 | AB847715 |
| <i>D. cf. candidum</i>       | <i>Dendrobium</i>      | 29746         | AB593519 | AB847716 |
| <i>D. cf. gratiosissimum</i> | <i>Dendrobium</i>      | TBG126713     | AB593522 | AB847719 |
| <i>D. cf. griffithianum</i>  | <i>Densiflora</i>      | TBG128876     | AB593523 | AB847720 |
| <i>D. cf. hancockii</i>      | <i>Dendrobium</i>      | TBG142251     | AB593524 | AB847721 |
| <i>D. cf. jenkinsii</i>      | <i>Densiflora</i>      | TBG129904     | AB593525 | AB847722 |
| <i>D. cf. microglaphys</i>   | <i>Amblyanthus</i>     | TBG116027     | AB593526 | AB847723 |
| <i>D. cf. primulinum</i>     | <i>Dendrobium</i>      | TBG118293     | AB593521 | AB847718 |
| <i>D. cf. roseipes</i>       | <i>Pedilonum</i>       | TBG159460     | AB847648 | AB847717 |
| <i>D. chameleon</i>          | <i>Calcarifera</i>     | TBG135506     | AB593527 | AB847724 |
| <i>D. chrysanthum</i>        | <i>Dendrobium</i>      | TBG124319     | AB593529 | AB847725 |
| <i>D. chryseum</i>           | <i>Holochrysa</i>      | TBG127382     | AB593530 | AB847726 |
| <i>D. chrysocrepis</i>       | <i>Dendrobium</i>      | TBG128879     | AB593531 | AB847727 |
| <i>D. chrysotoxum</i>        | <i>Densiflora</i>      | TBG118321     | AB593533 | AB847728 |
| <i>D. codonosepalum</i>      | <i>Calyptrochilus</i>  | TBG137050     | AB847649 | AB847729 |
| <i>D. compactum</i>          | <i>Stachyobium</i>     | TBG133060     | AB847650 | AB847730 |
| <i>D. crepidatum</i>         | <i>Dendrobium</i>      | TBG128871     | AB593534 | AB847731 |
| <i>D. cruentum</i>           | <i>Formosae</i>        | TBG134572     | AB593536 | AB847733 |
| <i>D. crumenatum</i>         | <i>Crumenata</i>       | TBG115833     | AB593537 | AB847734 |
| <i>D. crystallinum</i>       | <i>Dendrobium</i>      | TNS8502972    | AB593538 | AB847735 |
| <i>D. cumulatum</i>          | <i>Calcarifera</i>     | TBG159418     | AB593541 | AB847737 |
| <i>D. cuthbertsonii</i>      | <i>Oxyglossum</i>      | TBG116108     | AB593542 | AB847738 |
| <i>D. cyanocentrum</i>       | <i>Oxyglossum</i>      | TBG159420     | AB593543 | AB847739 |
| <i>D. dearei</i>             | <i>Formosae</i>        | TBG144587     | AB847651 | AB847740 |
| <i>D. delacourii</i>         | <i>Stachyobium</i>     | TBG100237     | AB593545 | AB847741 |
| <i>D. densiflorum</i>        | <i>Densiflora</i>      | TBG159421     | AB593546 | AB847742 |
| <i>D. denudans</i>           | <i>Stachyobium</i>     | TBG132760     | AB593547 | AB847743 |
| <i>D. devonianum</i>         | <i>Dendrobium</i>      | TBG124383     | AB593548 | AB847744 |
| <i>D. diodon</i>             | <i>Stachyobium</i>     | TBG116089     | AB593550 | AB847745 |
| <i>D. distichum</i>          | <i>Aporum</i>          | TBG137051     | AB593551 | AB847746 |
| <i>D. dixanthum</i>          | <i>Holochrysa</i>      | TBG128877     | AB593552 | AB847747 |
| <i>D. draconis</i>           | <i>Formosae</i>        | TBG118276     | AB593553 | AB847748 |
| <i>D. ellipsophyllum</i>     | <i>Distichophyllae</i> | TBG126635     | AB593554 | AB847749 |
| <i>D. ephemerum</i>          | <i>Crumenata</i>       | TBG159426     | AB593555 | AB847750 |
| <i>D. eriiflorum</i>         | <i>Stachyobium</i>     | TBG140557     | AB593556 | AB847751 |
| <i>D. erosum</i>             | <i>Calyptrochilus</i>  | TBG159429     | AB593557 | AB847752 |
| <i>D. eserre</i>             | <i>Stachyobium</i>     | TBG133168     | AB593558 | AB847753 |
| <i>D. faciferum</i>          | <i>Crumenata</i>       | YukawaDNA2134 | AB847652 | AB847754 |

Continued

## Appendix 1. Continued

| Species                     | Section               | Voucher        | ITS      | matK     |
|-----------------------------|-----------------------|----------------|----------|----------|
| <i>D. fairchildiae</i>      | <i>Calcarifera</i>    | TBG120506      | AB593559 | AB847755 |
| <i>D. falconeri</i>         | <i>Dendrobium</i>     | TBG128903      | AB593560 | AB847756 |
| <i>D. farmeri</i>           | <i>Densiflora</i>     | TBG159430      | AB593561 | AB847757 |
| <i>D. fimbriatum</i>        | <i>Holochrysa</i>     | 84386          | AB593562 | AB847758 |
| <i>D. findlayanum</i>       | <i>Dendrobium</i>     | TBG128904      | AB593563 | AB847759 |
| <i>D. formosum</i>          | <i>Formosae</i>       | TBG128902      | AB593564 | AB847760 |
| <i>D. friedericksianum</i>  | <i>Dendrobium</i>     | TBG124322      | AB593565 | AB847761 |
| <i>D. furcatum</i>          | <i>Dolichocentrum</i> | TBG116070      | AB593566 | AB847762 |
| <i>D. fytchianum</i>        | <i>Fytchianthe</i>    | TBG128868      | AB593567 | AB847763 |
| <i>D. gibsonii</i>          | <i>Holochrysa</i>     | TBG129876      | AB593568 | AB847764 |
| <i>D. glomeratum</i>        | <i>Calyptrochilus</i> | TBG138022      | AB593535 | AB847732 |
| <i>D. goldfinchii</i>       | <i>Crumenata</i>      | Yukawa 97-2008 | AB593569 | AB847765 |
| <i>D. goldschmidtianum</i>  | <i>Pedilonum</i>      | TBG159434      | AB593570 | AB847766 |
| <i>D. gratiosissimum</i>    | <i>Dendrobium</i>     | TBG126651      | AB593571 | AB847767 |
| <i>D. gregulus</i>          | <i>Stachyobium</i>    | TBG132862      | AB593572 | AB847768 |
| <i>D. griffithianum</i>     | <i>Densiflora</i>     | TBG138067      | AB593573 | AB847769 |
| <i>D. guibertii</i>         | <i>Densiflora</i>     | TBG132542      | AB593574 | AB847770 |
| <i>D. hancockii</i>         | <i>Dendrobium</i>     | TBG122506      | AB593575 | AB847771 |
| <i>D. harveyanum</i>        | <i>Dendrobium</i>     | TBG133184      | AB593576 | AB847772 |
| <i>D. hasseltii</i>         | <i>Pedilonum</i>      | TBG136022      | AB593577 | AB847773 |
| <i>D. hemimelanoglossum</i> | <i>Stachyobium</i>    | TBG133257      | AB593578 | AB847774 |
| <i>D. henryi</i>            | <i>Holochrysa</i>     | TBG127415      | AB593579 | AB847775 |
| <i>D. herbaceum</i>         | <i>Herbaceae</i>      | TBG156719      | AB847654 | AB847776 |
| <i>D. hercoglossum_1</i>    | <i>Breviflores</i>    | TBG118850      | AB593580 | AB847777 |
| <i>D. hercoglossum_2</i>    | <i>Breviflores</i>    | TBG124432      | AB593581 | AB847778 |
| <i>D. heterocarpum</i>      | <i>Dendrobium</i>     | TBG116506      | AB593582 | AB847779 |
| <i>D. hookerianum</i>       | <i>Dendrobium</i>     | TBG133007      | AB593584 | AB847780 |
| <i>D. hymenophyllum</i>     | <i>Calcarifera</i>    | TBG140599      | AB847655 | AB847781 |
| <i>D. intricatum</i>        | <i>Calcarifera</i>    | TBG137294      | AB593586 | AB847782 |
| <i>D. jacobsonii</i>        | <i>Pedilonum</i>      | TBG133080      | AB593587 | AB847783 |
| <i>D. jenkinsii</i>         | <i>Densiflora</i>     | TBG129880      | AB593589 | AB847784 |
| <i>D. jerdonianum</i>       | <i>Formosae</i>       | TBG156717      | AB847656 | AB847785 |
| <i>D. junceum</i>           | <i>Crumenata</i>      | TBG119079      | AB593590 | AB847786 |
| <i>D. kentrophyllum</i>     | <i>Aporum</i>         | TBG102615      | AB593591 | AB847787 |
| <i>D. kontumense</i>        | <i>Formosae</i>       | TBG126642      | AB593592 | AB847788 |
| <i>D. kraemeri</i>          | <i>Pedilonum</i>      | TBG123234      | AB847657 | AB847789 |
| <i>D. kratense</i>          | <i>Stachyobium</i>    | TBG126712      | AB847658 | AB847790 |
| <i>D. laevifolium</i>       | <i>Oxyglossum</i>     | TBG142428      | AB593593 | AB847791 |

Continued

## Appendix 1. Continued

| Species                                           | Section                | Voucher        | ITS      | matK     |
|---------------------------------------------------|------------------------|----------------|----------|----------|
| <i>D. lamyanae</i>                                | <i>Dendrobium</i>      | TBG116046      | AB593595 | AB847792 |
| <i>D. lancifolium</i>                             | <i>Calcarifera</i>     | TBG142427      | AB847659 | AB847793 |
| <i>D. laterale</i>                                | <i>Stachyobium</i>     | TNS8501719     | AB847660 | AB847794 |
| <i>D. lawesii</i>                                 | <i>Calyptrochilus</i>  | TBG140275      | AB593596 | AB847795 |
| <i>D. leonis</i>                                  | <i>Aporum</i>          | 84206          | AB593597 | AB847796 |
| <i>D. leptocladum</i>                             | <i>Dendrobium</i>      | TNS8502939     | AB593598 | AB847797 |
| <i>D. linawianum</i>                              | <i>Dendrobium</i>      | TBG142429      | AB593599 | AB847798 |
| <i>D. lindleyi</i>                                | <i>Densiflora</i>      | TBG115834      | AB593600 | AB847799 |
| <i>D. linguella</i>                               | <i>Breviflores</i>     | TBG115831      | AB593601 | AB847800 |
| <i>D. lituiflorum</i>                             | <i>Dendrobium</i>      | TBG128908      | AB593602 | AB847801 |
| <i>D. lobbii</i>                                  | <i>Conostalix</i>      | NSW426014      | AB593603 | AB847802 |
| <i>D. loddigesii</i>                              | <i>Dendrobium</i>      | 74531          | AB593604 | AB847803 |
| <i>D. lohohense</i>                               | <i>Holochrysa</i>      | TBG132863      | AB593605 | AB847804 |
| <i>D. longicornu</i>                              | <i>Formosae</i>        | TBG122802      | AB847661 | AB847805 |
| <i>D. lowii</i>                                   | <i>Formosae</i>        | TBG134848      | AB593606 | AB847806 |
| <i>D. luteolum</i>                                | <i>Dendrobium</i>      | TBG122798      | AB593607 | AB847807 |
| <i>D. maccarthiae</i>                             | <i>Dendrobium</i>      | TBG128803      | AB593608 | AB847808 |
| <i>D. macfarlanei</i>                             | <i>Crumenata</i>       | TBG122496      | AB847662 | AB847809 |
| <i>D. macrostachyum</i>                           | <i>Dendrobium</i>      | TBG123340      | AB847663 | AB847810 |
| <i>D. masarangense</i> subsp. <i>theionanthum</i> | <i>Oxyglossum</i>      | Tajima 27      | AB593609 | AB847811 |
| <i>D. melanostictum</i>                           | <i>Amblyanthus</i>     | TBG123873      | AB593610 | AB847812 |
| <i>D. melinanthum</i>                             | <i>Calyptrochilus</i>  | TBG159436      | AB593611 | AB847813 |
| <i>D. microglaphys</i>                            | <i>Amblyanthus</i>     | TBG135481      | AB593612 | AB847814 |
| <i>D. mohlianum</i>                               | <i>Calyptrochilus</i>  | TBG124783      | AB593613 | AB847815 |
| <i>D. moniliforme</i>                             | <i>Dendrobium</i>      | TBG115845      | AB593614 | AB847816 |
| <i>D. morrisonii</i>                              | <i>Pedilonum</i>       | Yukawa 97-2045 | AB847664 | AB847817 |
| <i>D. moschatum</i>                               | <i>Holochrysa</i>      | 56113          | AB593616 | AB847818 |
| <i>D. mutabile</i>                                | <i>Calcarifera</i>     | TBG159437      | AB593617 | AB847819 |
| <i>D. nemorale</i>                                | <i>Distichophyllae</i> | TBG159440      | AB593618 | AB847820 |
| <i>D. nobile</i>                                  | <i>Dendrobium</i>      | TBG128809      | AB593619 | AB847821 |
| <i>D. ochreatum</i>                               | <i>Dendrobium</i>      | TBG128865      | AB593621 | AB847822 |
| <i>D. okinawense</i>                              | <i>Dendrobium</i>      | TBG115938      | AB593622 | AB847823 |
| <i>D. oligophyllum</i>                            | <i>Distichophyllae</i> | TBG128728      | AB847665 | AB847824 |
| <i>D. pachyglossum</i>                            | <i>Conostalix</i>      | TBG124380      | AB593623 | AB847825 |
| <i>D. pachyphyllum</i>                            | <i>Bolbodium</i>       | TBG126623      | AB593624 | AB847826 |
| <i>D. palpebrae_1</i>                             | <i>Densiflora</i>      | TBG159441      | AB593625 | AB847827 |
| <i>D. palpebrae_2</i>                             | <i>Densiflora</i>      | TBG159442      | AB593626 | AB847828 |
| <i>D. palpebrae_3</i>                             | <i>Densiflora</i>      | TBG118313      | AB593627 | AB847829 |

Continued

## Appendix 1. Continued

| Species                  | Section               | Voucher       | ITS      | matK     |
|--------------------------|-----------------------|---------------|----------|----------|
| <i>D. panduriferum</i>   | <i>Calcarifera</i>    | TBG144531     | AB847666 | AB847830 |
| <i>D. papilio</i>        | <i>Dolichocentrum</i> | TBG120493     | AB847667 | AB847831 |
| <i>D. parciflorum</i>    | <i>Aporum</i>         | TBG118261     | AB593628 | AB847832 |
| <i>D. parcum</i>         | <i>Herbaceae</i>      | TBG129884     | AB593629 | AB847833 |
| <i>D. parishii</i>       | <i>Dendrobium</i>     | TBG159443     | AB593630 | AB847834 |
| <i>D. parthenium</i>     | <i>Formosae</i>       | TBG136015     | AB847668 | AB847835 |
| <i>D. patentilobum</i>   | <i>Aporum</i>         | TBG137060     | AB847669 | AB847836 |
| <i>D. pendulum</i>       | <i>Dendrobium</i>     | TBG128867     | AB593633 | AB847837 |
| <i>D. philippinense</i>  | <i>Crumenata</i>      | TBG142250     | AB593634 | AB847838 |
| <i>D. platygastrium</i>  | <i>Platycaulon</i>    | TBG142432     | AB593635 | AB847839 |
| <i>D. polyanthum</i>     | <i>Dendrobium</i>     | TBG159417     | AB593636 | AB847840 |
| <i>D. porphyrochilum</i> | <i>Stachyobium</i>    | TBG141468     | AB593637 | AB847841 |
| <i>D. praecinctum</i>    | <i>Stuposa</i>        | TBG116030     | AB593638 | AB847842 |
| <i>D. prasinum</i>       | <i>Oxyglossum</i>     | TBG119108     | AB593639 | AB847843 |
| <i>D. prianganense</i>   | <i>Calcarifera</i>    | TBG134835     | AB593640 | AB847844 |
| <i>D. primulinum</i>     | <i>Dendrobium</i>     | TBG159445     | AB593641 | AB847845 |
| <i>D. profusum</i>       | <i>Calcarifera</i>    | TBG133266     | AB593642 | AB847846 |
| <i>D. pulchellum</i>     | <i>Holochrysa</i>     | TBG118088     | AB593643 | AB847847 |
| <i>D. rarum</i>          | <i>Pedilonum</i>      | TBG124851     | AB593644 | AB847848 |
| <i>D. regium</i>         | <i>Dendrobium</i>     | TNS8501314    | AB593645 | AB847849 |
| <i>D. rhombeum_1</i>     | <i>Dendrobium</i>     | TBG135976     | AB593646 | AB847850 |
| <i>D. rhombeum_2</i>     | <i>Dendrobium</i>     | TBG142436     | AB593647 | AB847851 |
| <i>D. roseiodorum</i>    | <i>Formosae</i>       | TBG118270     | AB593648 | AB847852 |
| <i>D. roseipes</i>       | <i>Pedilonum</i>      | TBG142437     | AB593649 | AB847853 |
| <i>D. rosellum</i>       | <i>Aporum</i>         | TBG133320     | AB593650 | AB847854 |
| <i>D. ruckeri</i>        | <i>Dendrobium</i>     | TBG159446     | AB593651 | AB847855 |
| <i>D. sanderiae</i>      | <i>Formosae</i>       | TBG120503     | AB593654 | AB847856 |
| <i>D. sanguinolentum</i> | <i>Calcarifera</i>    | TBG159447     | AB593655 | AB847857 |
| <i>D. scabrilingue</i>   | <i>Formosae</i>       | TBG119087     | AB593656 | AB847858 |
| <i>D. schuetzei</i>      | <i>Formosae</i>       | TBG119088     | AB593658 | AB847859 |
| <i>D. scoriarum</i>      | <i>Dendrobium</i>     | YukawaDNA0381 | AB593659 | AB847860 |
| <i>D. secundum</i>       | <i>Pedilonum</i>      | TBG100260     | AB593660 | AB847862 |
| <i>D. senile</i>         | <i>Dendrobium</i>     | TBG119090     | AB593661 | AB847863 |
| <i>D. signatum</i>       | <i>Dendrobium</i>     | TBG133598     | AB593662 | AB847864 |
| <i>D. singkawangense</i> | <i>Formosae</i>       | TBG141081     | AB593663 | AB847865 |
| <i>D. smillieae</i>      | <i>Pedilonum</i>      | TBG1402699    | AB593664 | AB847866 |
| <i>D. sp.</i>            | <i>Stachyobium</i>    | YukawaDNA0749 | AB847670 | AB847861 |
| <i>D. spatella</i>       | <i>Aporum</i>         | TBG84203      | AB847671 | AB847867 |

Continued



## Appendix 1. Continued

| Species                     | Section                | Voucher    | ITS      | matK     |
|-----------------------------|------------------------|------------|----------|----------|
| <i>D. speckmaieri</i>       | <i>Platycaulon</i>     | TBG136027  | AB593665 | AB847868 |
| <i>D. spectatissimum</i>    | <i>Formosae</i>        | TBG133877  | AB593666 | AB847869 |
| <i>D. stockeri</i>          | <i>Amblyanthus</i>     | TBG130082  | AB593667 | AB847870 |
| <i>D. stuposum</i>          | <i>Stuposa</i>         | TBG134843  | AB593668 | AB847871 |
| <i>D. sulcatum</i>          | <i>Densiflora</i>      | TBG159451  | AB593670 | AB847872 |
| <i>D. sutepense</i>         | <i>Formosae</i>        | TNS8503543 | AB593671 | AB847873 |
| <i>D. suzukii</i>           | <i>Formosae</i>        | TNS9518319 | AB593672 | AB847874 |
| <i>D. tetrachromum</i>      | <i>Dendrobium</i>      | TBG137068  | AB847672 | AB847875 |
| <i>D. thyrsoflorum</i>      | <i>Densiflora</i>      | TBG159453  | AB593674 | AB847876 |
| <i>D. tobaense</i>          | <i>Formosae</i>        | TBG126681  | AB593677 | AB847877 |
| <i>D. tortile</i>           | <i>Dendrobium</i>      | TBG119099  | AB593678 | AB847878 |
| <i>D. trankimianum</i>      | <i>Formosae</i>        | TBG127512  | AB847673 | AB847879 |
| <i>D. transparens</i>       | <i>Dendrobium</i>      | TBG126731  | AB593679 | AB847880 |
| <i>D. trantuanii</i>        | <i>Breviflores</i>     | TBG157296  | AB847674 | AB847881 |
| <i>D. trichostomum</i>      | <i>Calyptrochilus</i>  | TBG142265  | AB593680 | AB847882 |
| <i>D. trigonopus</i>        | <i>Formosae</i>        | TBG119100  | AB847675 | AB847883 |
| <i>D. unicum</i>            | <i>Dendrobium</i>      | TBG119101  | AB593682 | AB847884 |
| <i>D. uniflorum</i>         | <i>Distichophyllae</i> | TBG120499  | AB593683 | AB847885 |
| <i>D. venustum</i>          | <i>Stachyobium</i>     | TBG129885  | AB847676 | AB847886 |
| <i>D. victoriae-reginae</i> | <i>Calcarifera</i>     | TBG141156  | AB593684 | AB847887 |
| <i>D. violaceum</i>         | <i>Oxyglossum</i>      | TBG100203  | AB593685 | AB847888 |
| <i>D. wardianum</i>         | <i>Dendrobium</i>      | TBG126641  | AB593686 | AB847889 |
| <i>D. ypsilon</i>           | <i>Platycaulon</i>     | TBG118514  | AB593688 | AB847890 |
